# Supplementary material for: Meta-Analyses of Splicing and Expression Quantitative Trait Loci Identified Susceptibility Genes of Glioma
Source: Frontiers journal article supplement (doi:10.3389/fgene.2021.609657), 2021-04-15
Supplement: Data_Sheet_1.zip [file Data_Sheet_1.zip]

**Supplementary Table 8. sQTL SMR statistics. SMR and HEIDI statistics for the significant SMR associated sQTL results.**

| Loci     | GWAS SNP               | Colocalized Regulatory SNP | A1/A2 (Co. Reg SNP) | A1 Freq (Co. Reg SNP) | r <sup>2</sup> (Co. Reg SNP & GWAS SNP) | Target Gene    | Genomic Location (hg19) of Alternatively Spliced Intron Cluster Region from Leafcutter | β (SE) (SMR) | P-value (SMR) | P-value (HEIDI) | N of SNPs in HEIDI test |
|----------|------------------------|----------------------------|---------------------|-----------------------|-----------------------------------------|----------------|----------------------------------------------------------------------------------------|--------------|---------------|-----------------|-------------------------|
| 1q44     | rs12076373             | rs10927051                 | C/G                 | 0.2                   | 0.71                                    | AKT3           | clu_56564-243727150-243736228                                                          | -0.63 (0.16) | 1.43E-04      | 3.35E-01        | 5                       |
| 2q33.3   | rs7572263              | rs7572263                  | G/A                 | 0.24                  | 1                                       | C2orf80        | clu_49792-209047771-209054677                                                          | 0.72 (0.17)  | 1.28E-05      | 6.60E-01        | 5                       |
|          |                        | rs7583625                  | G/A                 | 0.25                  | 0.96                                    | C2orf80        | clu_49792-209047771-209048618                                                          | 0.51 (0.1)   | 3.34E-07      | 2.67E-01        | 8                       |
| 7p11.2   | rs723527<br>rs75061358 | rs2699247                  | A/G                 | 0.36                  | 0.03<br>0.07                            | SEC61G         | clu_32096-54825287-54826851                                                            | 0.31 (0.07)  | 6.63E-06      | 7.08E-02        | 3                       |
|          |                        | rs2699247                  | A/G                 | 0.36                  | 0.03<br>0.07                            | SEC61G         | clu_32096-54825287-54826855                                                            | -0.35 (0.08) | 1.47E-05      | 1.04E-01        | 3                       |
| 11q23.3  | rs12803321             | rs11216924                 | G/C                 | 0.14                  | 0.22                                    | TMEM25         | clu_9404-118412790-118416834                                                           | -0.63 (0.14) | 1.25E-05      | 9.62E-02        | 3                       |
|          |                        | rs73023341                 | G/A                 | 0.14                  | 0.23                                    | TMEM25         | clu_9404-118405070-118419942                                                           | -1.05 (0.27) | 9.27E-05      | 2.16E-01        | 4                       |
|          |                        | rs61900957                 | T/C                 | 0.09                  | 0.16                                    | TMEM25         | clu_9432-118402586-118402865                                                           | 0.55 (0.12)  | 1.96E-06      | 6.25E-01        | 3                       |
|          |                        | rs11217021                 | C/T                 | 0.25                  | 0.43                                    | DDX6           | clu_9452-118627996-118630631                                                           | 1.26 (0.36)  | 4.22E-04      | 6.13E-01        | 4                       |
|          |                        | rs7125115                  | A/G                 | 0.38                  | 0.9                                     | PHLDB1         | clu_9440-118478414-118484531                                                           | 0.53 (0.07)  | 8.89E-15      | 1.70E-01        | 20                      |
|          |                        | rs7125115                  | A/G                 | 0.38                  | 0.9                                     | PHLDB1         | clu_9440-118481241-118484009                                                           | -0.79 (0.11) | 2.38E-12      | 4.84E-01        | 17                      |
|          |                        | rs7125115                  | A/G                 | 0.38                  | 0.9                                     | PHLDB1         | clu_9440-118481241-118484531                                                           | -0.76 (0.11) | 4.31E-12      | 5.67E-01        | 16                      |
| 15q24.2  | rs77633900             | rs34213321                 | G/A                 | 0.53                  | 0.08                                    | ETFA           | clu_20348-76588078-76603691                                                            | -0.41 (0.09) | 9.44E-06      | 3.36E-01        | 3                       |
| 16p13.3  | rs3751667              | rs34316274                 | G/A                 | 0.23                  | 0.75                                    | LMF1           | clu_16201-918097-918944                                                                | -0.89 (0.25) | 4.47E-04      | 8.35E-01        | 4                       |
|          |                        | rs34316274                 | G/A                 | 0.23                  | 0.75                                    | RP11-161M6.2   | clu_16093-1030705-1031145                                                              | -0.51 (0.14) | 2.27E-04      | 3.85E-01        | 6                       |
|          |                        | rs34316274                 | G/A                 | 0.23                  | 0.75                                    | RP11-161M6.2   | clu_16094-1026071-1026778                                                              | 0.49 (0.14)  | 3.58E-04      | 5.19E-01        | 5                       |
|          |                        | rs4984741                  | A/G                 | 0.24                  | 0.8                                     | RP11-161M6.2   | clu_16094-1026559-1026778                                                              | 0.66 (0.19)  | 4.79E-04      | 4.23E-01        | 4                       |
| 16q12.1  | rs10852606             | rs12932038                 | C/T                 | 0.71                  | 1                                       | HEATR3         | clu_17583-50100180-50100278                                                            | -0.5 (0.11)  | 9.99E-06      | 7.39E-01        | 17                      |
|          |                        | rs2058815                  | G/T                 | 0.7                   | 0.92                                    | HEATR3         | clu_17585-50109622-50109966                                                            | -0.83 (0.21) | 1.10E-04      | 6.16E-01        | 7                       |
|          |                        | rs2058815                  | G/T                 | 0.7                   | 0.92                                    | HEATR3         | clu_17585-50110000-50112652                                                            | -0.96 (0.27) | 3.82E-04      | 6.37E-01        | 7                       |
|          |                        | rs2287197                  | C/T                 | 0.71                  | 0.99                                    | HEATR3         | clu_17584-50102778-50103156                                                            | -0.58 (0.11) | 1.93E-07      | 2.37E-01        | 13                      |
|          |                        | rs2287197                  | C/T                 | 0.71                  | 0.99                                    | HEATR3         | clu_17584-50102778-50109482                                                            | -0.52 (0.09) | 3.24E-08      | 2.44E-01        | 16                      |
|          |                        | rs2287197                  | C/T                 | 0.71                  | 0.99                                    | HEATR3         | clu_17584-50103200-50104089                                                            | -0.62 (0.12) | 4.68E-07      | 5.38E-01        | 12                      |
|          |                        | rs8046344                  | G/C                 | 0.71                  | 1                                       | HEATR3         | clu_17584-50102778-50104055                                                            | -0.81 (0.19) | 3.06E-05      | 5.99E-01        | 12                      |
| 20q13.33 | rs2297440              | rs1295810                  | A/G                 | 0.2                   | 0.78                                    | RTEL1-TNFRSF6B | clu_30381-62321563-62321639                                                            | -1.63 (0.29) | 2.55E-08      | 1.14E-01        | 18                      |
|          |                        | rs2150910                  | C/T                 | 0.91                  | 0.25                                    | RTEL1-TNFRSF6B | clu_30376-62294908-62297357                                                            | -1.06 (0.25) | 1.65E-05      | 2.16E-01        | 20                      |
|          |                        | rs3208007                  | C/T                 | 0.8                   | 0.99                                    | RTEL1-TNFRSF6B | clu_30380-62320485-62320855                                                            | 0.59 (0.07)  | 2.93E-17      | 1.13E-01        | 20                      |
|          |                        | rs4809328                  | T/C                 | 0.71                  | 0.47                                    | RTEL1-TNFRSF6B | clu_30385-62325841-62326419                                                            | 0.99 (0.27)  | 2.45E-04      | 5.41E-02        | 3                       |
|          |                        | rs6062487                  | T/A                 | 0.11                  | 0.03                                    | TNFRSF6B       | clu_30388-62328544-62329633                                                            | 1.04 (0.29)  | 4.09E-04      | 1.19E-01        | 3                       |
|          |                        | rs6122154                  | T/C                 | 0.19                  | 0.75                                    | LIME1          | clu_30312-62367538-62368886                                                            | 1.49 (0.41)  | 2.69E-04      | 2.88E-01        | 11                      |
|          |                        | rs6122154                  | T/C                 | 0.19                  | 0.75                                    | LIME1          | clu_30312-62368064-62368886                                                            | -1.08 (0.24) | 8.85E-06      | 6.11E-02        | 20                      |
| 22q13.1  | rs2235573              | rs6000943                  | C/T                 | 0.37                  | 0.39                                    | C22orf23       | clu_28314-38341132-38343288                                                            | 0.46 (0.13)  | 4.02E-04      | 1.37E-01        | 5                       |
