# Supplementary material for: Meta-Analyses of Splicing and Expression Quantitative Trait Loci Identified Susceptibility Genes of Glioma
Source: Frontiers journal article supplement (doi:10.3389/fgene.2021.609657), 2021-04-15

Supplementary Figure 2A. 1p31.3

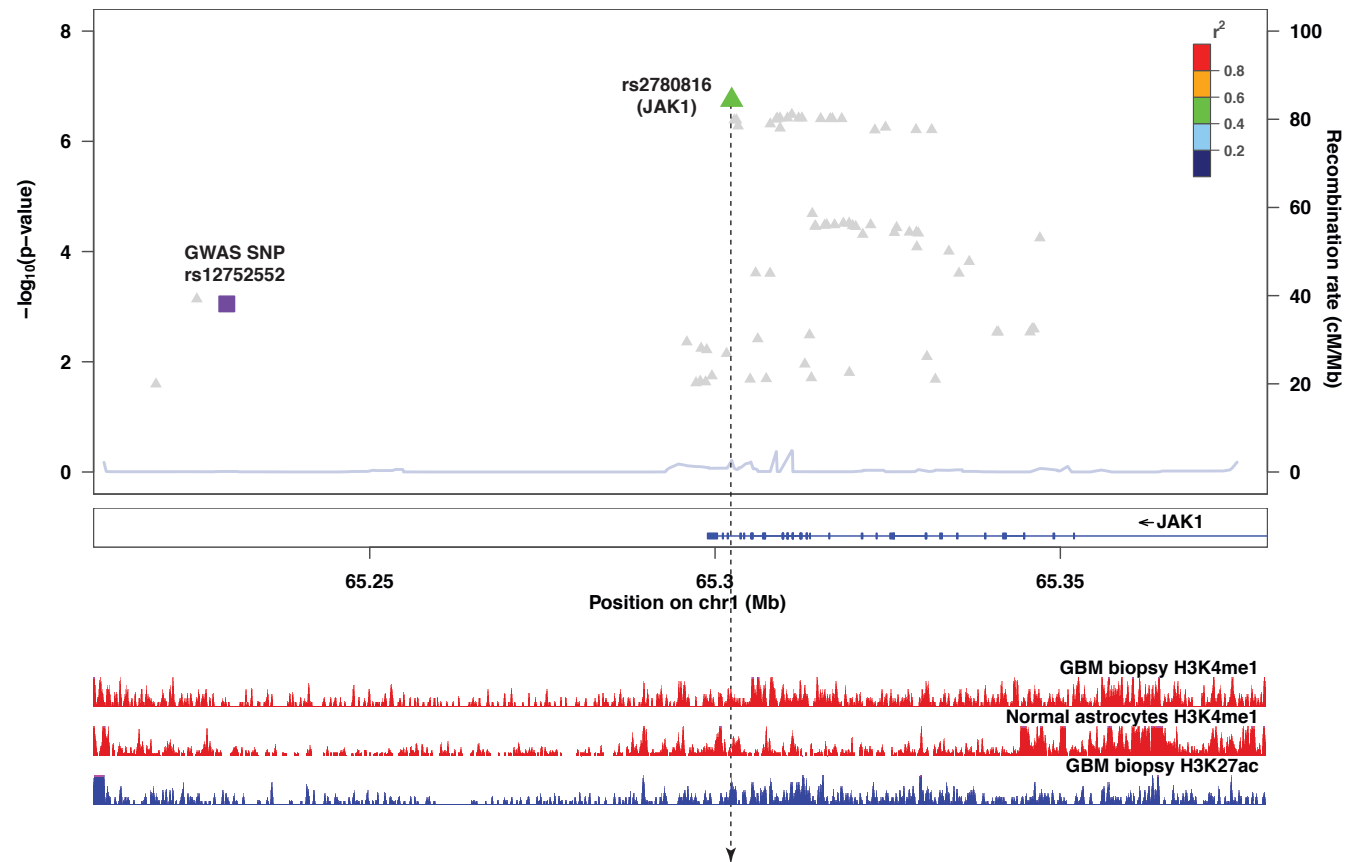

Supplementary Figure 2B. 2q33.3

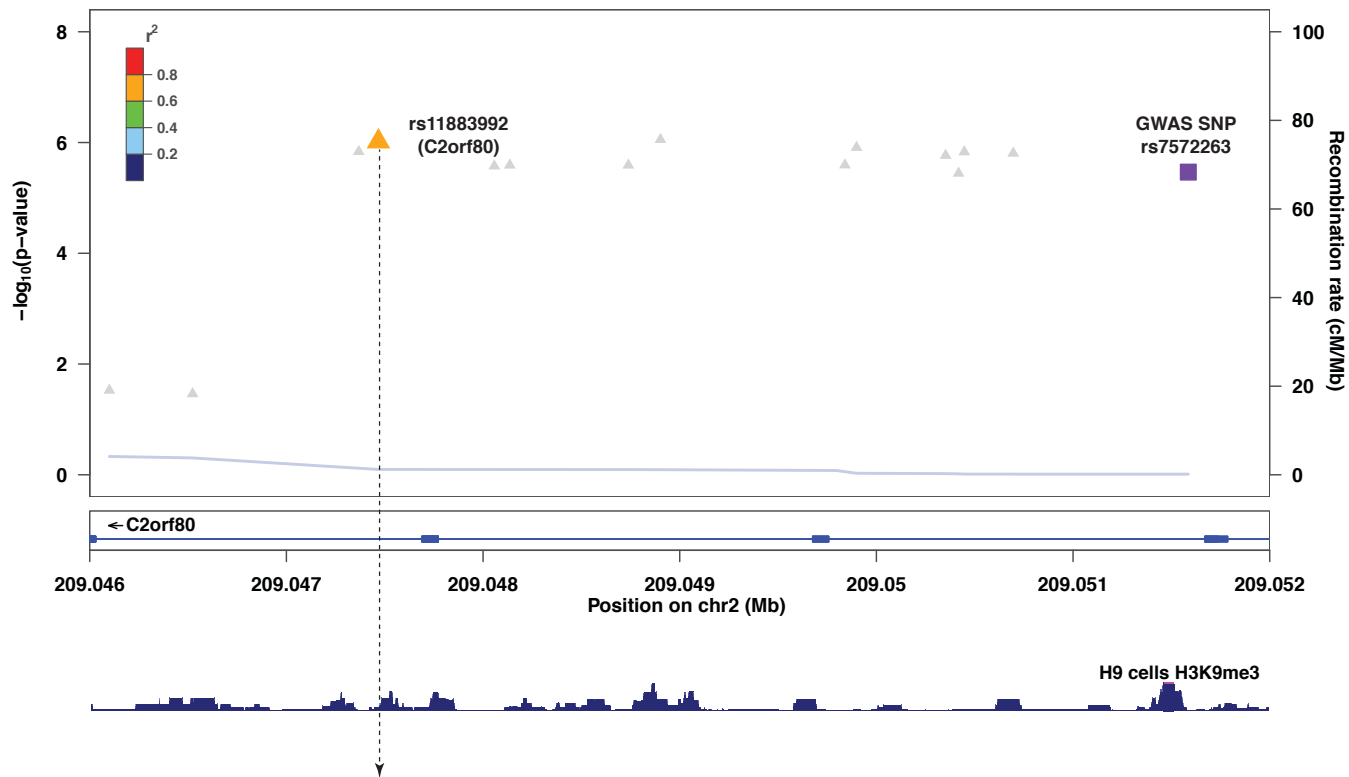

Supplementary Figure 2C. 5p15.33

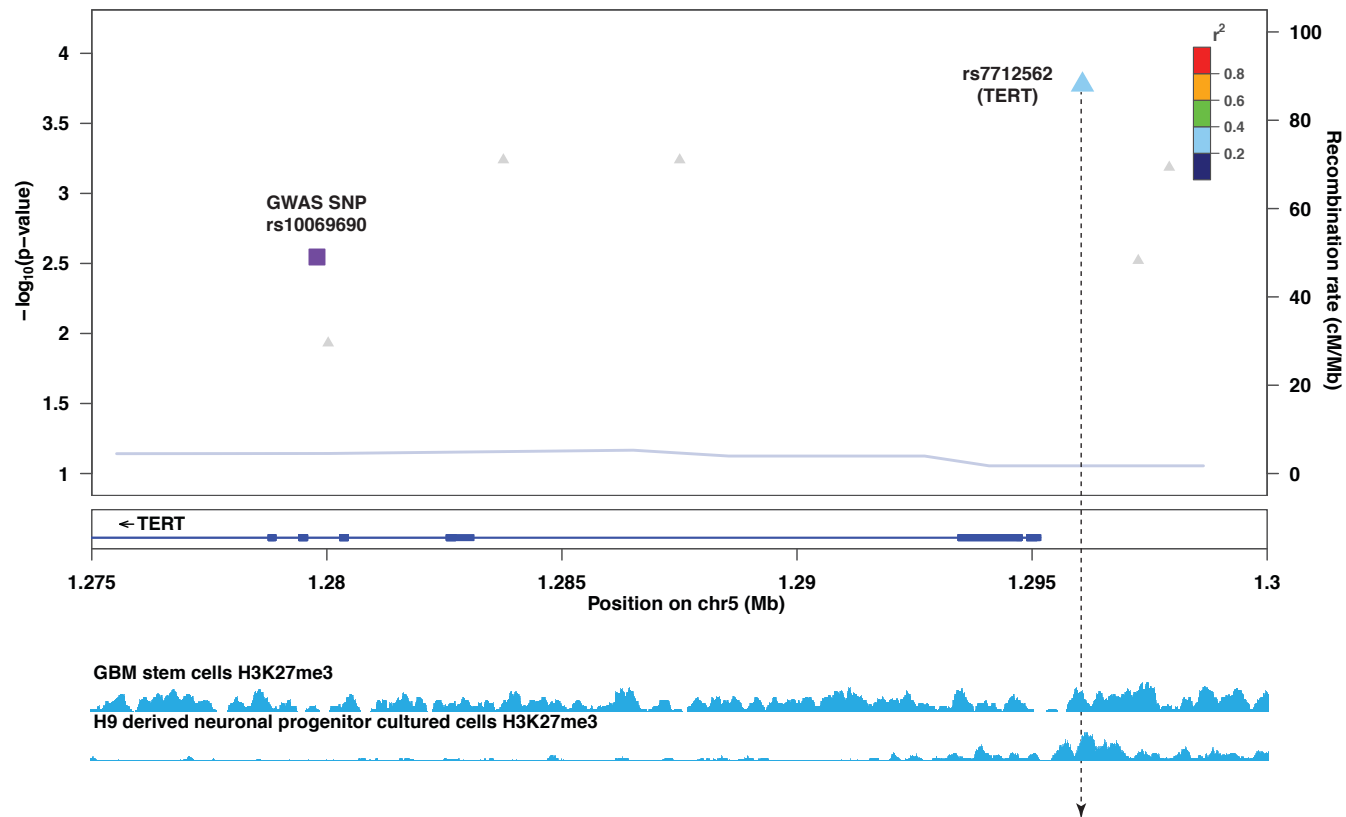

Supplementary Figure 2D. 7p11.2

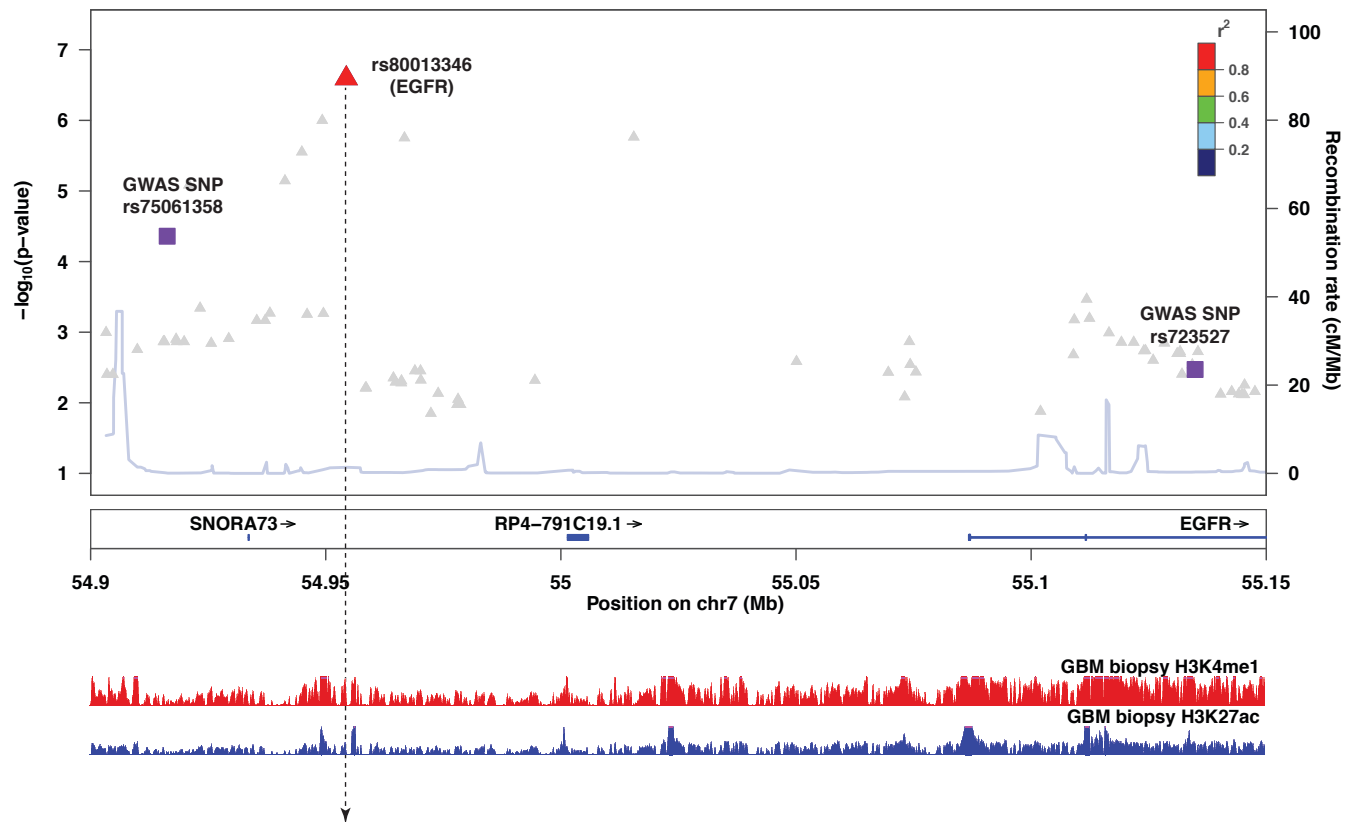

Supplementary Figure 2E. 10q24.33

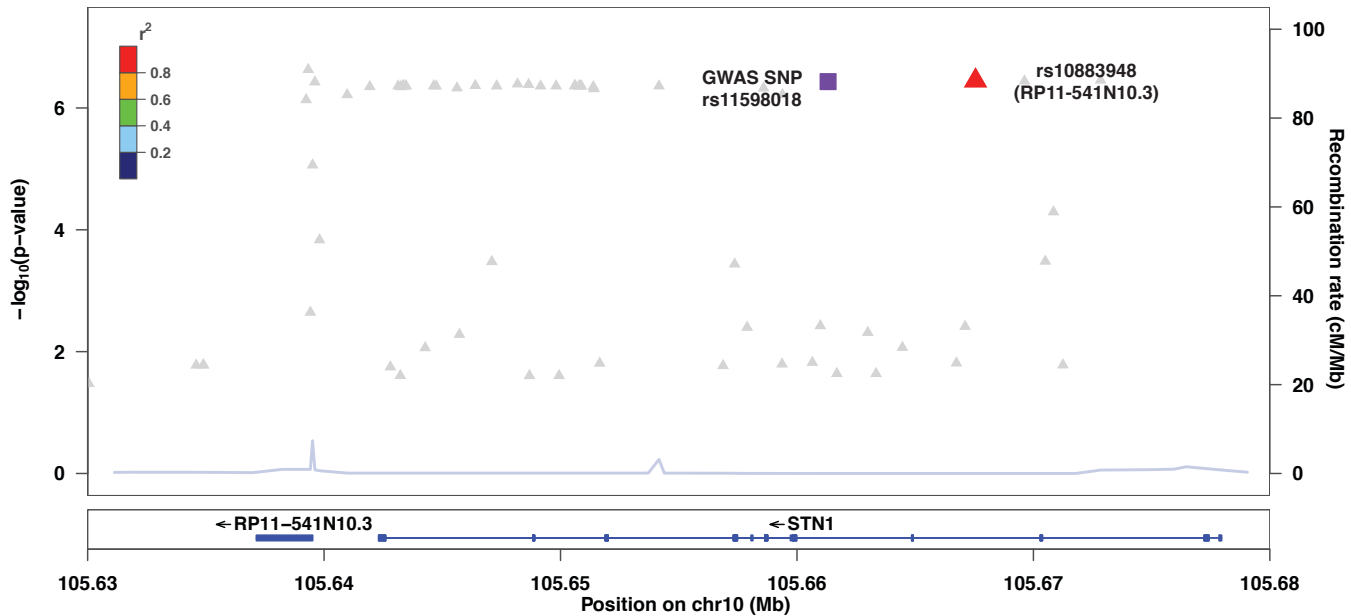

Supplementary Figure 2F. 11q23.3

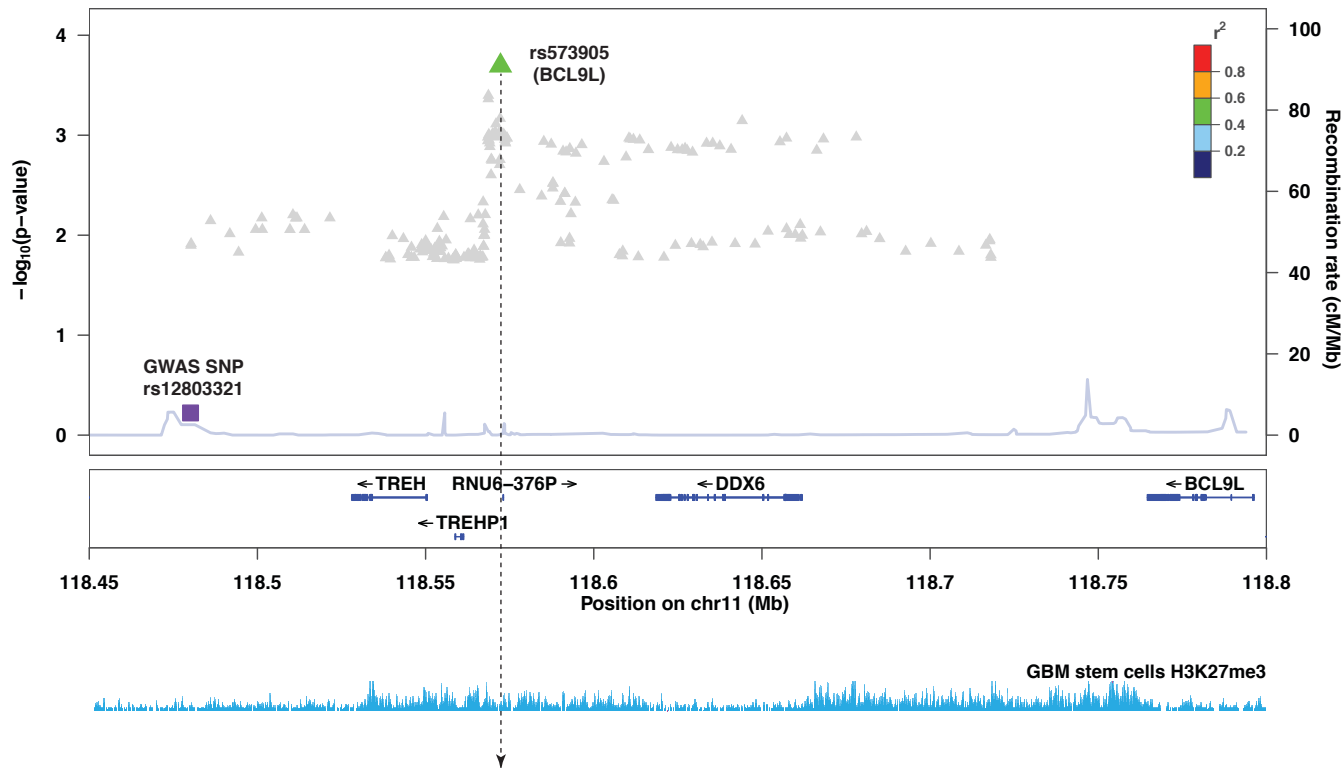

Supplementary Figure 2G. 15q24.2

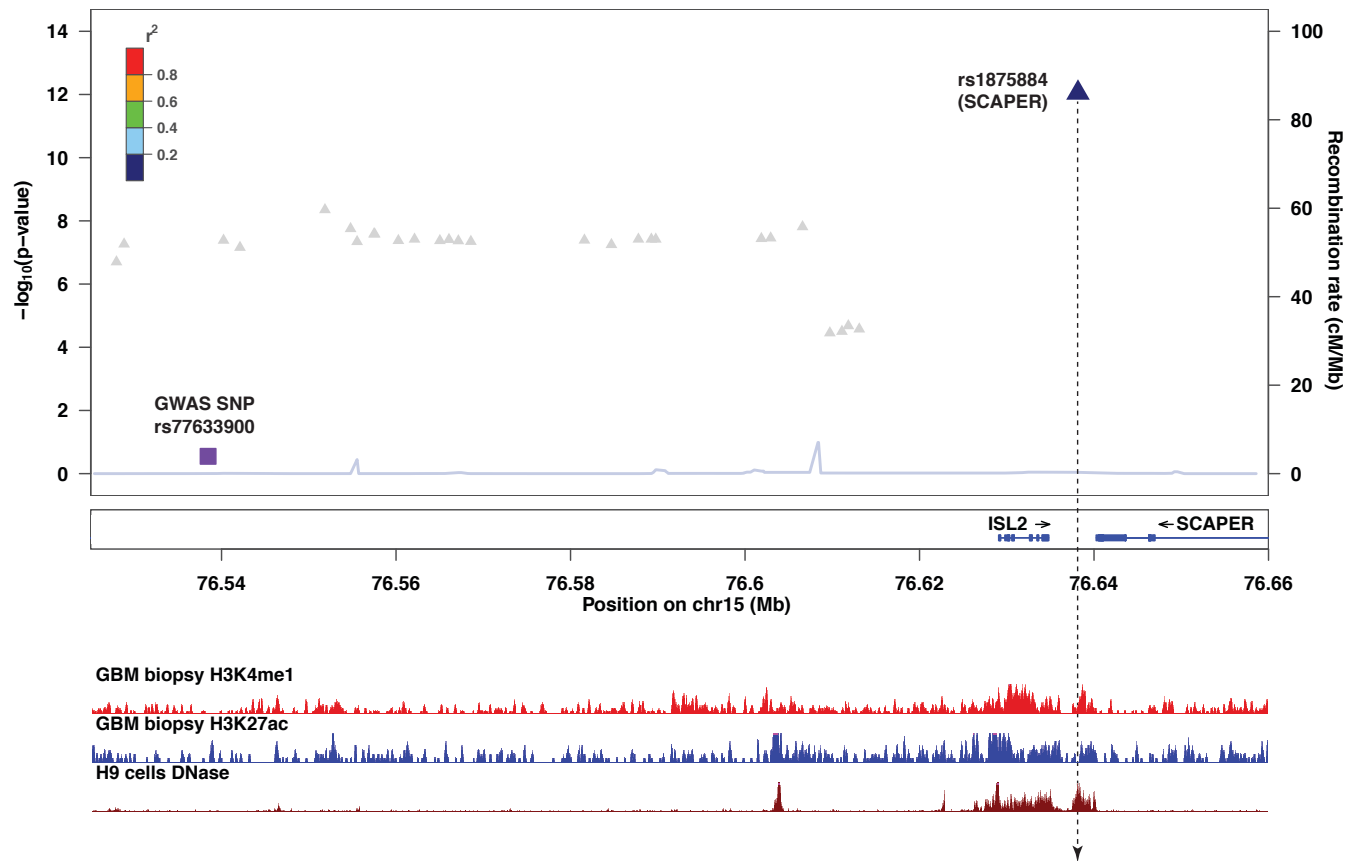

Supplementary Figure 2H. 16q12.1

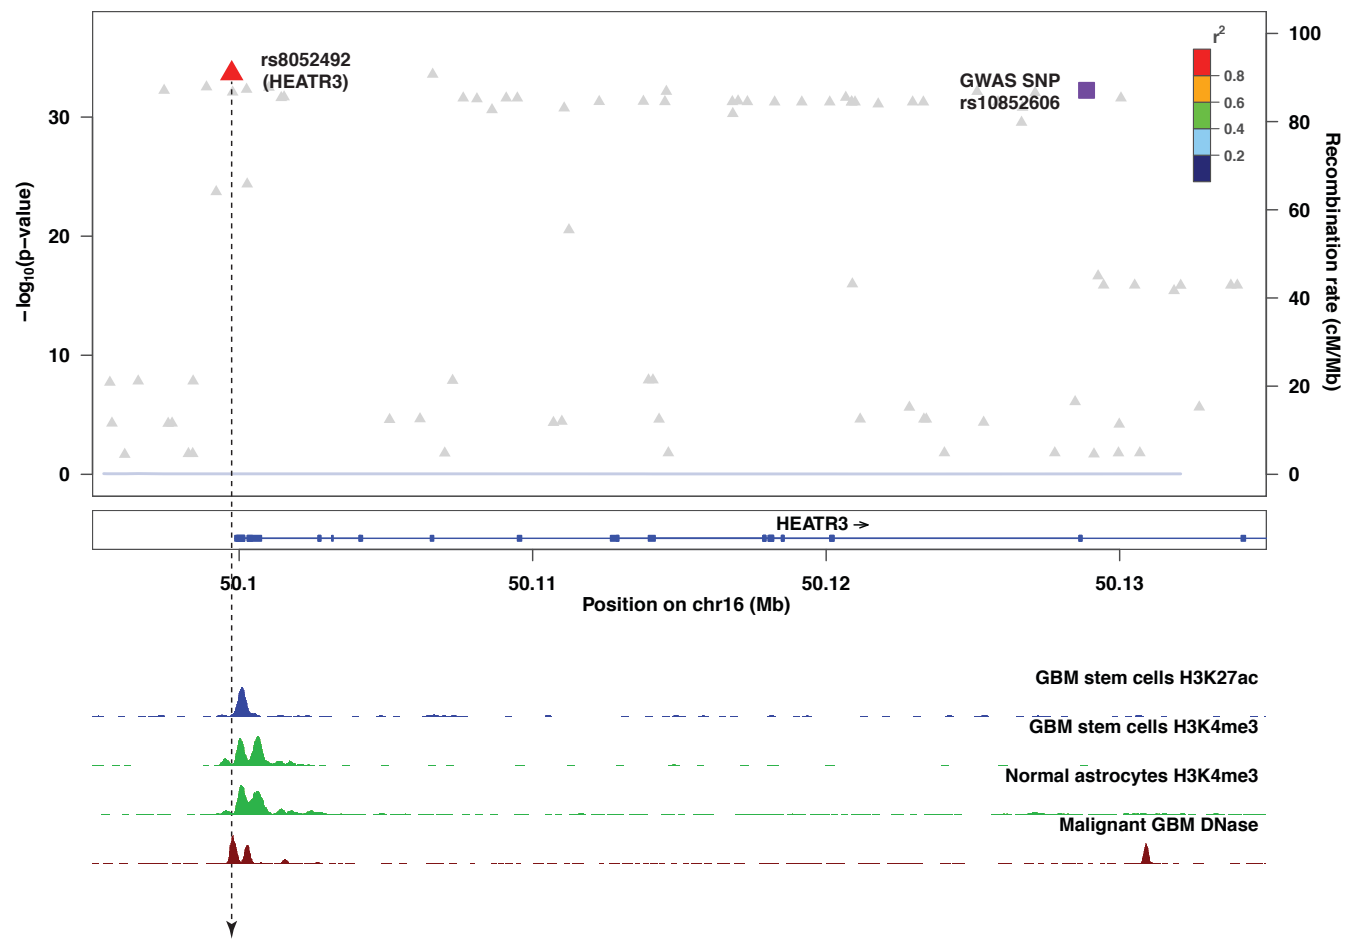

Supplement: Data_Sheet_1.zip [file Data_Sheet_1.zip]
