# Supplementary material for: Meta-Analyses of Splicing and Expression Quantitative Trait Loci Identified Susceptibility Genes of Glioma
Source: Frontiers journal article supplement (doi:10.3389/fgene.2021.609657), 2021-04-15

Supplementary Figure 3A. 1q44

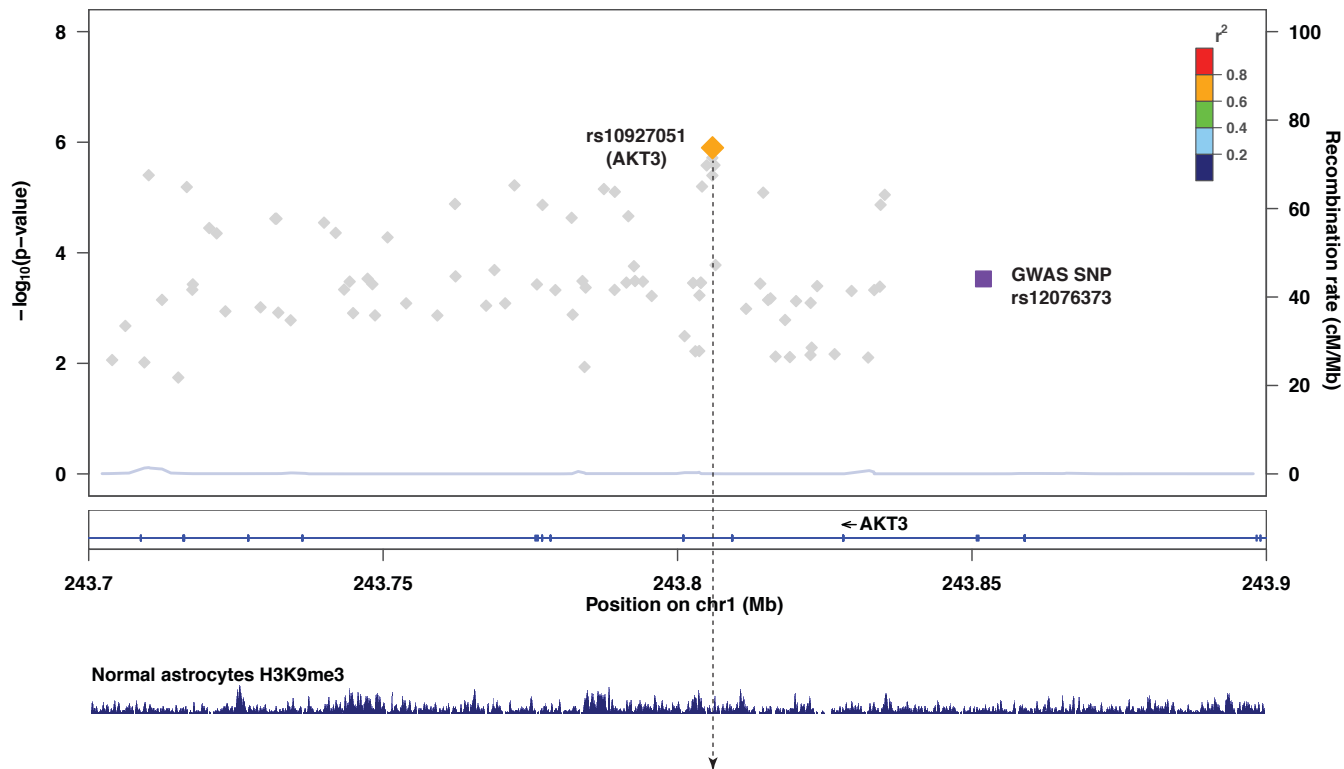

Supplementary Figure 3B. 2q33.3

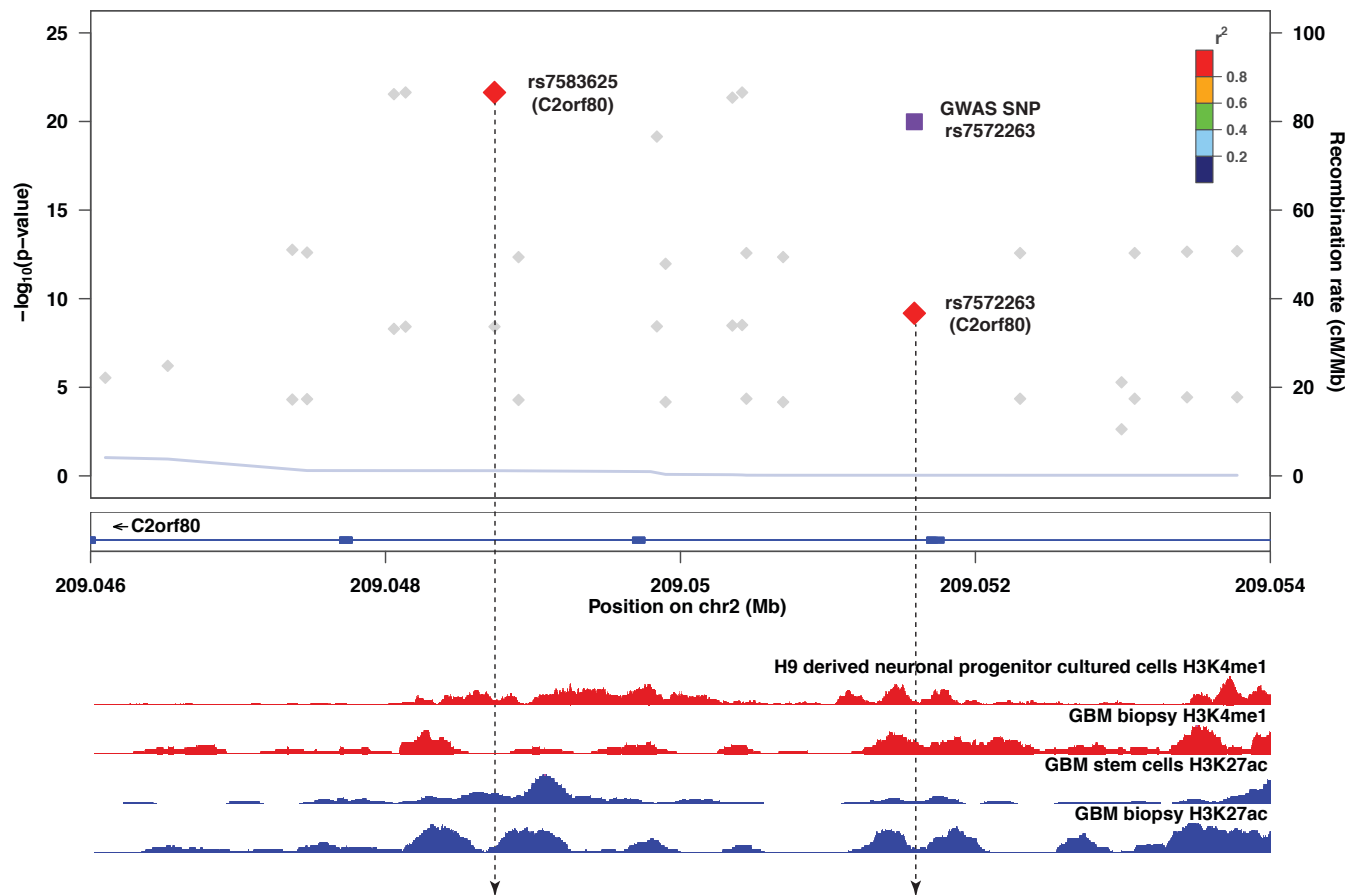

Supplementary Figure 3C. 7p11.2

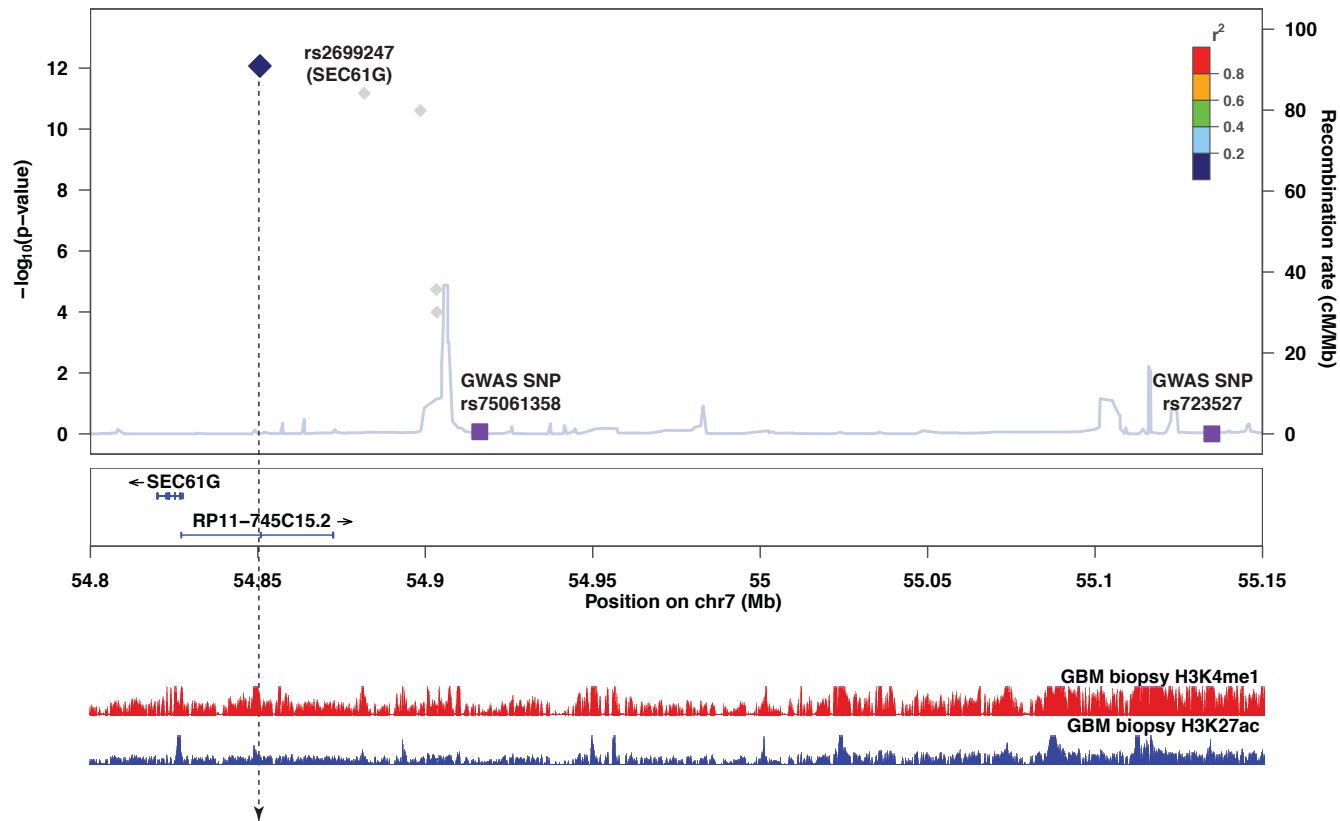

Supplementary Figure 3D. 15q24.2

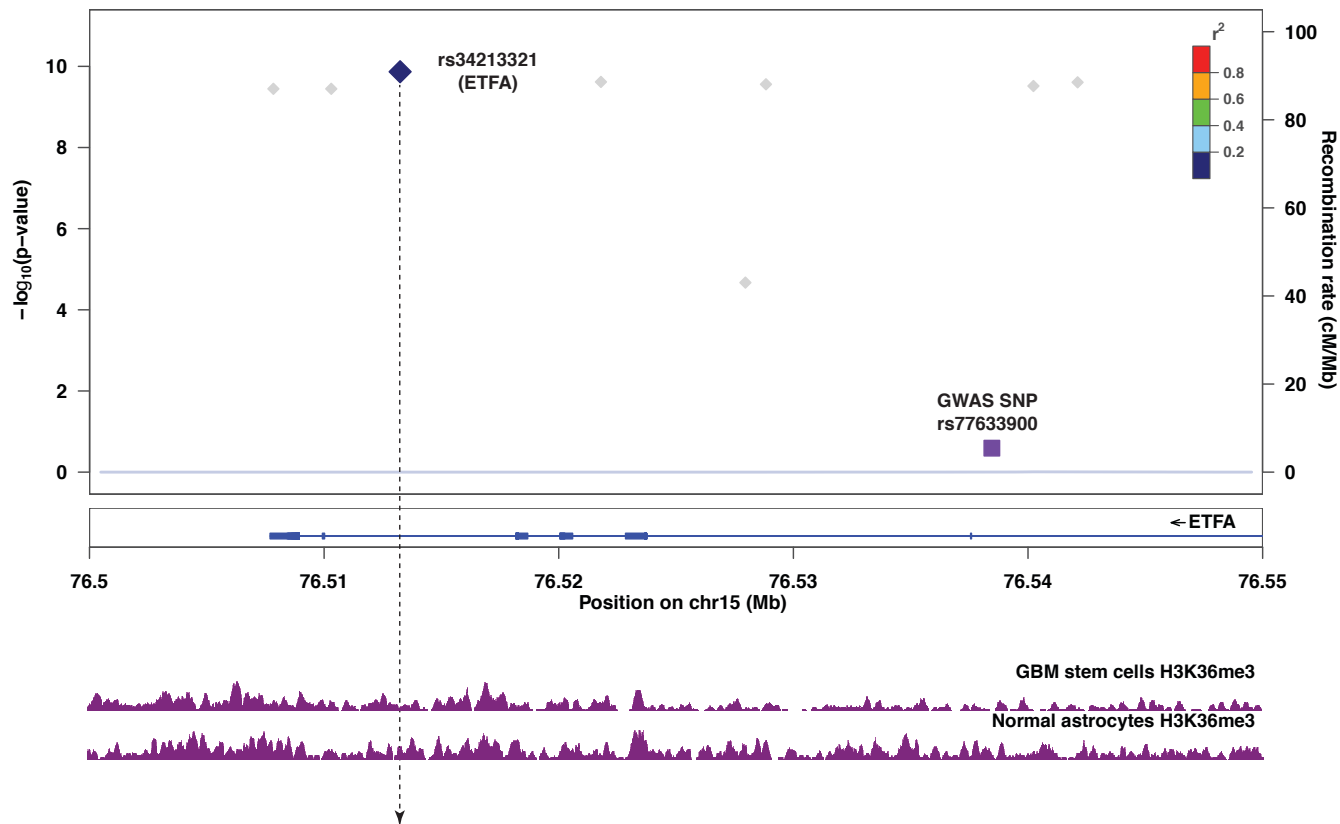

Supplementary Figure 3E. 22q13.1

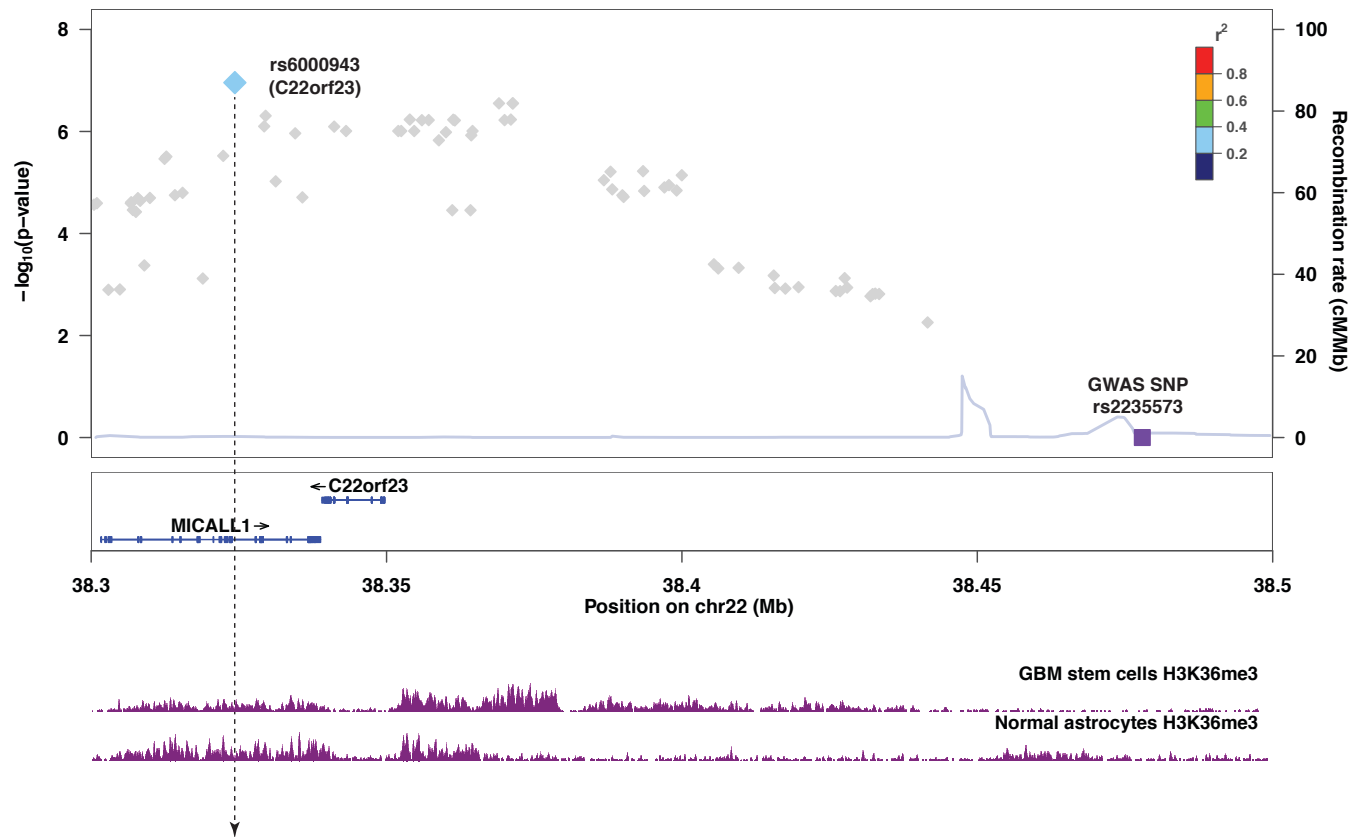

Supplement: Data_Sheet_1.zip [file Data_Sheet_1.zip]
