# Supplementary material for: Meta-Analyses of Splicing and Expression Quantitative Trait Loci Identified Susceptibility Genes of Glioma
Source: Frontiers journal article supplement (doi:10.3389/fgene.2021.609657), 2021-04-15
Supplement: Data_Sheet_1.zip [file Data_Sheet_1.zip]

**Supplementary Table 7. eQTL SMR statistics. SMR and HEIDI statistics for the significant colocalized eQTL results reported in Table 1.**

| Loci     | GWAS SNP               | Colocalized<br>Regulatory SNP | A1/A2<br>(Co. Reg<br>SNP) | A1<br>Freq<br>(Co. Reg<br>SNP) | $r^2$ (Co.<br>Reg SNP<br>& GWAS<br>SNP) | Target Gene   | $\beta$ (SE)<br>(SMR) | P-value<br>(SMR) | P-value<br>(HEIDI) | N of<br>SNPs in<br>HEIDI<br>test |
|----------|------------------------|-------------------------------|---------------------------|--------------------------------|-----------------------------------------|---------------|-----------------------|------------------|--------------------|----------------------------------|
| 1p31.3   | rs12752552             | rs2780816                     | A/C                       | 0.24                           | 0.45                                    | JAK1          | 2.73 (0.72)           | 1.41E-04         | 1.57E-01           | 19                               |
| 2q33.3   | rs7572263              | rs11883992                    | A/T                       | 0.18                           | 0.66                                    | C2orf80       | -1.73 (0.46)          | 1.77E-04         | 8.63E-01           | 8                                |
| 5p15.33  | rs10069690             | rs7712562                     | G/A                       | 0.84                           | 0.23                                    | TERT          | 2.73 (0.75)           | 3.02E-04         | 2.45E-01           | 11                               |
| 7p11.2   | rs723527<br>rs75061358 | rs80013346                    | A/G                       | 0.11                           | 0.05<br>0.87                            | EGFR          | -1.73 (0.37)          | 2.68E-06         | 3.48E-01           | 16                               |
| 9p21.3   | rs634537               | rs2106120                     | T/G                       | 0.47                           | 0.62                                    | CDKN2B-AS1    | -2.6 (0.51)           | 3.27E-07         | 5.03E-01           | 20                               |
|          |                        | rs2518723                     | T/C                       | 0.48                           | 0.53                                    | CDKN2B        | -1.93 (0.41)          | 3.21E-06         | 7.94E-02           | 20                               |
| 10q24.33 | rs11598018             | rs10883948                    | T/G                       | 0.54                           | 1                                       | RP11-541N10.3 | -1.53 (0.41)          | 1.74E-04         | 6.40E-01           | 6                                |
| 11q23.3  | rs12803321             | rs573905                      | G/A                       | 0.54                           | 0.52                                    | BCL9L         | -3.76 (1.09)          | 5.46E-04         | 3.13E-01           | 11                               |
| 15q24.2  | rs77633900             | rs1875884                     | T/C                       | 0.51                           | 0.06                                    | SCAPER        | 2.09 (0.48)           | 1.13E-05         | 8.96E-02           | 5                                |
| 16q12.1  | rs10852606             | rs8052492                     | G/A                       | 0.29                           | 0.99                                    | HEATR3        | 1.04 (0.17)           | 1.73E-09         | 1.22E-01           | 20                               |
| 20q13.33 | rs2297440              | rs4809318                     | A/G                       | 0.21                           | 0.29                                    | GMEB2         | -4.29 (1.13)          | 1.57E-04         | 6.24E-01           | 6                                |
|          |                        | rs6062497                     | T/C                       | 0.71                           | 0.49                                    | ARFRP1        | 4.29 (1.06)           | 5.02E-05         | 5.08E-02           | 20                               |
|          |                        | rs909334                      | A/C                       | 0.21                           | 0.62                                    | STMN3         | -3.88 (0.89)          | 1.33E-05         | 8.54E-02           | 20                               |
| 22q13.1  | rs2235573              | rs5756894                     | A/C                       | 0.6                            | 0.59                                    | PICK1         | 1.54 (0.36)           | 2.43E-05         | 6.78E-01           | 19                               |
|          |                        | rs6000991                     | C/T                       | 0.61                           | 0.57                                    | SLC16A8       | 0.86 (0.2)            | 2.04E-05         | 9.32E-02           | 18                               |
