# Supplementary material for: Meta-Analyses of Splicing and Expression Quantitative Trait Loci Identified Susceptibility Genes of Glioma
Source: Frontiers journal article supplement (doi:10.3389/fgene.2021.609657), 2021-04-15
Supplement: Data_Sheet_1.zip [file Data_Sheet_1.zip]

Supplementary Table 2: ChIP-seq and cell lines resources. Details of the public datasets used for epigenomic annotations as illustrated in Table 3 and Table 4.

| Cell lines                                    | ChIP-seq | Source                      | Link                                                                                                                                                                                                                                                                    |
|-----------------------------------------------|----------|-----------------------------|-------------------------------------------------------------------------------------------------------------------------------------------------------------------------------------------------------------------------------------------------------------------------|
| GBM stem cells                                | H3K4me1  | NCBI GEO                    | <a href="https://www.ncbi.nlm.nih.gov/geo/query/acc.cgi?acc=GSM1121881">https://www.ncbi.nlm.nih.gov/geo/query/acc.cgi?acc=GSM1121881</a>                                                                                                                               |
| GBM stem cells                                | H3K4me3  | NCBI GEO                    | <a href="https://www.ncbi.nlm.nih.gov/geo/query/acc.cgi?acc=GSM1121882">https://www.ncbi.nlm.nih.gov/geo/query/acc.cgi?acc=GSM1121882</a>                                                                                                                               |
| GBM stem cells                                | H3K27ac  | NCBI GEO                    | <a href="https://www.ncbi.nlm.nih.gov/geo/query/acc.cgi?acc=GSM1121878">https://www.ncbi.nlm.nih.gov/geo/query/acc.cgi?acc=GSM1121878</a>                                                                                                                               |
| GBM stem cells                                | H3K27me3 | NCBI GEO                    | <a href="https://www.ncbi.nlm.nih.gov/geo/query/acc.cgi?acc=GSM1121879">https://www.ncbi.nlm.nih.gov/geo/query/acc.cgi?acc=GSM1121879</a>                                                                                                                               |
| GBM stem cells                                | H3K36me3 | NCBI GEO                    | <a href="https://www.ncbi.nlm.nih.gov/geo/query/acc.cgi?acc=GSM1121880">https://www.ncbi.nlm.nih.gov/geo/query/acc.cgi?acc=GSM1121880</a>                                                                                                                               |
| Primary GBM                                   | H3K27ac  | NCBI GEO                    | <a href="https://www.ncbi.nlm.nih.gov/geo/query/acc.cgi?acc=GSM1824800">https://www.ncbi.nlm.nih.gov/geo/query/acc.cgi?acc=GSM1824800</a>                                                                                                                               |
| GBM biopsy                                    | H3K4me1  | NCBI GEO                    | <a href="https://www.ncbi.nlm.nih.gov/geo/query/acc.cgi?acc=GSM1866116">https://www.ncbi.nlm.nih.gov/geo/query/acc.cgi?acc=GSM1866116</a>                                                                                                                               |
| GBM biopsy                                    | H3K4me3  | NCBI GEO                    | <a href="https://www.ncbi.nlm.nih.gov/geo/query/acc.cgi?acc=GSM1866117">https://www.ncbi.nlm.nih.gov/geo/query/acc.cgi?acc=GSM1866117</a>                                                                                                                               |
| GBM biopsy                                    | H3K27ac  | NCBI GEO                    | <a href="https://www.ncbi.nlm.nih.gov/geo/query/acc.cgi?acc=GSM1866064">https://www.ncbi.nlm.nih.gov/geo/query/acc.cgi?acc=GSM1866064</a>                                                                                                                               |
| Normal Astrocytes                             | H3K4me1  | ENCODE                      | <a href="https://www.ncbi.nlm.nih.gov/geo/query/acc.cgi?acc=GSM733710">https://www.ncbi.nlm.nih.gov/geo/query/acc.cgi?acc=GSM733710</a>                                                                                                                                 |
| Normal Astrocytes                             | H3K4me3  | ENCODE                      | <a href="https://www.ncbi.nlm.nih.gov/geo/query/acc.cgi?acc=GSM733747">https://www.ncbi.nlm.nih.gov/geo/query/acc.cgi?acc=GSM733747</a>                                                                                                                                 |
| Normal Astrocytes                             | H3K27ac  | ENCODE                      | <a href="https://www.ncbi.nlm.nih.gov/geo/query/acc.cgi?acc=GSM733763">https://www.ncbi.nlm.nih.gov/geo/query/acc.cgi?acc=GSM733763</a>                                                                                                                                 |
| Normal Astrocytes                             | H3K9me3  | ENCODE                      | <a href="https://www.ncbi.nlm.nih.gov/geo/query/acc.cgi?acc=GSM1003491">https://www.ncbi.nlm.nih.gov/geo/query/acc.cgi?acc=GSM1003491</a>                                                                                                                               |
| Normal Astrocytes                             | H3K36me3 | ENCODE                      | <a href="https://www.ncbi.nlm.nih.gov/geo/query/acc.cgi?acc=GSM733751">https://www.ncbi.nlm.nih.gov/geo/query/acc.cgi?acc=GSM733751</a>                                                                                                                                 |
| Malignant GBM                                 | DNase    | ENCODE                      | <a href="https://www.ncbi.nlm.nih.gov/geo/query/acc.cgi?acc=GSM1024773">https://www.ncbi.nlm.nih.gov/geo/query/acc.cgi?acc=GSM1024773</a>                                                                                                                               |
| GBM                                           | DNase    | ENCODE                      | <a href="https://www.ncbi.nlm.nih.gov/geo/query/acc.cgi?acc=GSM816668">https://www.ncbi.nlm.nih.gov/geo/query/acc.cgi?acc=GSM816668</a>                                                                                                                                 |
| H9 cells                                      | H3K9me3  | Roadmap Epigenomics Project | <a href="ftp://ftp.ncbi.nlm.nih.gov/pub/geo/DATA/roadmapepigenomics/by_sample/H9_cell_line/H3K9me3/">ftp://ftp.ncbi.nlm.nih.gov/pub/geo/DATA/roadmapepigenomics/by_sample/H9_cell_line/H3K9me3/</a>                                                                     |
| H9 cells                                      | DNase    | Roadmap Epigenomics Project | <a href="ftp://ftp.ncbi.nlm.nih.gov/pub/geo/DATA/roadmapepigenomics/by_sample/H9_cell_line/DNase_hypersensitivity/">ftp://ftp.ncbi.nlm.nih.gov/pub/geo/DATA/roadmapepigenomics/by_sample/H9_cell_line/DNase_hypersensitivity/</a>                                       |
| H9 derived neuronal progenitor cultured cells | H3K4me1  | Roadmap Epigenomics Project | <a href="ftp://ftp.ncbi.nlm.nih.gov/pub/geo/DATA/roadmapepigenomics/by_sample/H9_derived_neuronal_progenitor_cultured_cells/H3K4me1/">ftp://ftp.ncbi.nlm.nih.gov/pub/geo/DATA/roadmapepigenomics/by_sample/H9_derived_neuronal_progenitor_cultured_cells/H3K4me1/</a>   |
| H9 derived neuronal progenitor cultured cells | H3K9me3  | Roadmap Epigenomics Project | <a href="ftp://ftp.ncbi.nlm.nih.gov/pub/geo/DATA/roadmapepigenomics/by_sample/H9_derived_neuronal_progenitor_cultured_cells/H3K9me3/">ftp://ftp.ncbi.nlm.nih.gov/pub/geo/DATA/roadmapepigenomics/by_sample/H9_derived_neuronal_progenitor_cultured_cells/H3K9me3/</a>   |
| H9 derived neuronal progenitor cultured cells | H3K27me3 | Roadmap Epigenomics Project | <a href="ftp://ftp.ncbi.nlm.nih.gov/pub/geo/DATA/roadmapepigenomics/by_sample/H9_derived_neuronal_progenitor_cultured_cells/H3K27me3/">ftp://ftp.ncbi.nlm.nih.gov/pub/geo/DATA/roadmapepigenomics/by_sample/H9_derived_neuronal_progenitor_cultured_cells/H3K27me3/</a> |
