# Supplementary material for: Meta-Analyses of Splicing and Expression Quantitative Trait Loci Identified Susceptibility Genes of Glioma
Source: Frontiers journal article supplement (doi:10.3389/fgene.2021.609657), 2021-04-15
Supplement: Data_Sheet_1.zip [file Data_Sheet_1.zip]

**Supplementary Table 1. Demographics of individuals included in the analysis**

|                                                                                                                                                                                                        | <b>CMC release 1<br/>(N = 216)</b> | <b>GTEEx version 7<br/>(N = 138)</b> |
|--------------------------------------------------------------------------------------------------------------------------------------------------------------------------------------------------------|------------------------------------|--------------------------------------|
| European Ancestry                                                                                                                                                                                      | 100%                               | 100%                                 |
| Range Age at Death*                                                                                                                                                                                    | 17 - 90+                           | 20 - 70                              |
| Mean Age (SE) at Death                                                                                                                                                                                 | 65.66 (1.31)                       | 57.83 (0.88)                         |
| Sex (% Female)                                                                                                                                                                                         | 42.59                              | 32.61                                |
| Post-mortem interval (PMI) (mean hours (SE))                                                                                                                                                           | 14.45 (0.53)                       | GTEEx PMI criteria within 24 hrs^    |
| Mean RNA Integrity Number (RIN) score (SE)                                                                                                                                                             | 7.80 (0.06)                        | 7.15 (0.03)                          |
| * Individuals with age >90 have been censored as 90+ for HIPAA compliance in CMC release 1 ( <a href="https://www.synapse.org/#!Synapse:syn3354385">https://www.synapse.org/#!Synapse:syn3354385</a> ) |                                    |                                      |
| ^Precise hours not provided by GTEEx.                                                                                                                                                                  |                                    |                                      |
