# Supplementary material for: Meta-Analyses of Splicing and Expression Quantitative Trait Loci Identified Susceptibility Genes of Glioma
Source: Frontiers journal article supplement (doi:10.3389/fgene.2021.609657), 2021-04-15
Supplement: Data_Sheet_1.zip [file Data_Sheet_1.zip]

## Sheet: Sheet1
Supplementary Table 6: Top sQTL meta-analysis results. Details of the top 5 sQTL meta-analysis results for each alternatively spliced intron cluster region from Leafcutter within every target gene of all the tested loci. Significant SMR assoicated sQTLs are highlighted in yellow. The significant sQTL results which were not within the top 5 meta-analysis results are highlighted in red font. Summar…
Loci	GWAS SNP	Regulatory SNP	LD of Reg SNP with GWAS SNP	Target Gene	Genomic Location (hg19) of Alternatively Spliced Intron Cluster Region from Leafcutter	CMC		GTEx		Meta-Analysis				Yellow highlights: sQTL meta-analyses that were significant in SMR analyses
						β (SE)	P value	β (SE)	P value	β (SE)	P value	FDR Q value
1p31.3	rs12752552	rs310244	0.32	RAVER2	clu_53052-65243775-65246393	0.04 (0.12)	0.76	0.18 (0.04)	1.1e-05	0.17 (0.04)	3.95e-05	0.00725
1p31.3	rs12752552	rs310235	0.3	RAVER2	clu_53052-65243775-65246393	0.02 (0.12)	0.854	0.17 (0.04)	3.55e-05	0.15 (0.04)	0.000163	0.00725
1p31.3	rs12752552	rs310233	0.3	RAVER2	clu_53052-65243775-65246393	0.01 (0.12)	0.928	0.17 (0.04)	3.55e-05	0.15 (0.04)	0.000187	0.00725
1p31.3	rs12752552	rs310208	0.23	RAVER2	clu_53052-65243775-65246393	-0.1 (0.11)	0.372	0.16 (0.04)	2.34e-05	0.14 (0.04)	0.000478	0.00725
1p31.3	rs12752552	rs2780831	0.23	RAVER2	clu_53052-65243775-65246393	-0.1 (0.11)	0.372	0.16 (0.04)	2.34e-05	0.14 (0.04)	0.000478	0.00725
1p31.3	rs12752552	rs76170379	0.8	RAVER2	clu_53052-65243775-65247063	-0.1 (0.18)	0.57	-0.27 (0.06)	2.23e-05	-0.25 (0.06)	0.000163	0.00725
1p31.3	rs12752552	rs2780827	0.71	RAVER2	clu_53052-65243775-65247063	-0.16 (0.17)	0.341	-0.27 (0.07)	3.85e-05	-0.26 (0.06)	0.000172	0.00725
1p31.3	rs12752552	rs12141878	0.36	RAVER2	clu_53052-65243775-65247063	-0.19 (0.29)	0.505	-0.34 (0.08)	3.87e-05	-0.33 (0.08)	0.000201	0.00725
1p31.3	rs12752552	rs10493372	0.8	RAVER2	clu_53052-65243775-65247063	-0.1 (0.18)	0.559	-0.26 (0.06)	3.55e-05	-0.24 (0.06)	0.000249	0.00725
1p31.3	rs12752552	rs12119466	0.8	RAVER2	clu_53052-65243775-65247063	-0.1 (0.18)	0.566	-0.26 (0.06)	3.55e-05	-0.24 (0.06)	0.000253	0.00725
1p31.3	rs12752552	rs310244	0.32	RAVER2	clu_53052-65246438-65247063	-0.02 (0.12)	0.843	0.17 (0.04)	4.31e-05	0.15 (0.04)	0.000356	0.00725
1p31.3	rs12752552	rs310208	0.23	RAVER2	clu_53052-65246438-65247063	-0.13 (0.11)	0.239	0.17 (0.04)	1.91e-05	0.14 (0.04)	0.000583	0.00725
1p31.3	rs12752552	rs2780831	0.23	RAVER2	clu_53052-65246438-65247063	-0.13 (0.11)	0.239	0.17 (0.04)	1.91e-05	0.14 (0.04)	0.000583	0.00725
1p31.3	rs12752552	rs310231	0.23	RAVER2	clu_53052-65246438-65247063	-0.13 (0.11)	0.226	0.17 (0.04)	1.91e-05	0.14 (0.04)	0.000611	0.00725
1p31.3	rs12752552	rs310230	0.23	RAVER2	clu_53052-65246438-65247063	-0.13 (0.11)	0.226	0.17 (0.04)	1.91e-05	0.14 (0.04)	0.000611	0.00725
1q44	rs12076373	rs10927051	0.71	AKT3	clu_56564-243727150-243736228	0.7 (0.1)	5.24e-11	0.11 (0.07)	0.114	0.3 (0.06)	1.26e-06	0.000286
1q44	rs12076373	rs10927049	0.67	AKT3	clu_56564-243727150-243736228	0.7 (0.1)	6.66e-11	0.11 (0.07)	0.118	0.3 (0.06)	1.92e-06	0.000286
1q44	rs12076373	rs2290754	0.71	AKT3	clu_56564-243727150-243736228	0.71 (0.1)	3.49e-11	0.1 (0.07)	0.165	0.29 (0.06)	2.6e-06	0.000286
1q44	rs12076373	rs73124169	0.74	AKT3	clu_56564-243727150-243736228	0.71 (0.1)	3.94e-11	0.1 (0.07)	0.165	0.29 (0.06)	2.63e-06	0.000286
1q44	rs12076373	rs7517340	0.66	AKT3	clu_56564-243727150-243736228	-0.72 (0.1)	8.56e-11	-0.1 (0.07)	0.141	-0.29 (0.06)	3.95e-06	0.00029
1q44	rs12076373	rs73124169	0.74	AKT3	clu_56564-243727150-243727587	-0.71 (0.11)	4.98e-10	-0.07 (0.06)	0.251	-0.22 (0.05)	0.00023	0.00344
1q44	rs12076373	rs10927050	0.7	AKT3	clu_56564-243727150-243727587	-0.72 (0.11)	6.29e-10	-0.07 (0.06)	0.257	-0.21 (0.05)	0.000296	0.00346
1q44	rs12076373	rs10927051	0.71	AKT3	clu_56564-243727150-243727587	-0.68 (0.11)	2.39e-09	-0.07 (0.06)	0.213	-0.21 (0.05)	0.000302	0.00346
1q44	rs12076373	rs2290754	0.71	AKT3	clu_56564-243727150-243727587	-0.7 (0.11)	1.47e-09	-0.07 (0.06)	0.251	-0.21 (0.05)	0.000367	0.00346
1q44	rs12076373	rs10927049	0.67	AKT3	clu_56564-243727150-243727587	-0.7 (0.11)	1.18e-09	-0.07 (0.06)	0.263	-0.21 (0.05)	0.000388	0.00351
1q44	rs12076373	rs2290753	0.34	AKT3	clu_56564-243727689-243736228	0.37 (0.09)	6.27e-05	0.09 (0.05)	0.0837	0.15 (0.04)	0.00281	0.0118
1q44	rs12076373	rs11585986	0.34	AKT3	clu_56564-243727689-243736228	0.37 (0.09)	8.4e-05	0.09 (0.05)	0.0837	0.15 (0.04)	0.00316	0.0131
1q44	rs12076373	rs2290754	0.71	AKT3	clu_56564-243727689-243736228	-0.66 (0.11)	4.72e-09	-0.02 (0.06)	0.684	-0.18 (0.05)	0.00439	0.0168
1q44	rs12076373	rs73124169	0.74	AKT3	clu_56564-243727689-243736228	-0.65 (0.11)	5.43e-09	-0.02 (0.06)	0.684	-0.18 (0.05)	0.00445	0.0168
1q44	rs12076373	rs12138722	0.32	AKT3	clu_56564-243727689-243736228	0.38 (0.09)	6.46e-05	0.08 (0.05)	0.117	0.15 (0.04)	0.00445	0.0168
1q44	rs12076373	rs12138753	0.34	AKT3	clu_56565-243736350-243776973	-0.04 (0.07)	0.567	-0.29 (0.05)	8.36e-07	-0.19 (0.04)	3.92e-05	0.000994
1q44	rs12076373	rs7528450	0.34	AKT3	clu_56565-243736350-243776973	-0.05 (0.07)	0.507	-0.28 (0.05)	1.51e-06	-0.19 (0.04)	4.78e-05	0.000994
1q44	rs12076373	rs1486472	0.28	AKT3	clu_56565-243736350-243776973	-0.06 (0.07)	0.376	-0.27 (0.06)	4.43e-06	-0.19 (0.04)	5.73e-05	0.000994
1q44	rs12076373	rs12143602	0.32	AKT3	clu_56565-243736350-243776973	-0.05 (0.07)	0.472	-0.27 (0.06)	2.42e-06	-0.19 (0.04)	6.3e-05	0.000994
1q44	rs12076373	rs10927044	0.32	AKT3	clu_56565-243736350-243776973	-0.05 (0.07)	0.472	-0.27 (0.06)	2.42e-06	-0.19 (0.04)	6.32e-05	0.000994
1q44	rs12076373	rs77030218	0.44	AKT3	clu_56567-243809339-243828074	-0.96 (0.19)	1.41e-06	-0.22 (0.1)	0.026	-0.37 (0.09)	5.03e-05	0.00249
1q44	rs12076373	rs12143245	0.43	AKT3	clu_56567-243809339-243828074	-0.93 (0.2)	5.69e-06	-0.21 (0.1)	0.0325	-0.35 (0.09)	0.000144	0.00249
1q44	rs12076373	rs10927046	0.86	AKT3	clu_56567-243809339-243828074	-0.78 (0.15)	5.22e-07	-0.13 (0.07)	0.0661	-0.25 (0.06)	0.000213	0.00249
1q44	rs12076373	rs12031994	0.91	AKT3	clu_56567-243809339-243828074	-0.84 (0.15)	1.1e-07	-0.12 (0.07)	0.0922	-0.25 (0.06)	0.000221	0.00249
1q44	rs12076373	rs58594024	0.99	AKT3	clu_56567-243809339-243828074	-0.79 (0.14)	1.17e-07	-0.11 (0.08)	0.168	-0.27 (0.07)	0.000241	0.00249
2q33.3	rs7572263	rs6710217	0.97	C2orf80	clu_49790-209034429-209035669	-0.36 (0.1)	0.000329	-0.3 (0.07)	5.22e-05	-0.32 (0.06)	1.16e-06	0.00055
2q33.3	rs7572263	rs6725512	0.97	C2orf80	clu_49790-209034429-209035669	-0.35 (0.1)	0.000483	-0.31 (0.07)	4.1e-05	-0.32 (0.06)	1.24e-06	0.00055
2q33.3	rs7572263	rs10804167	0.95	C2orf80	clu_49790-209034429-209035669	0.34 (0.1)	0.000599	0.3 (0.07)	6.26e-05	0.31 (0.06)	2.48e-06	0.00055
2q33.3	rs7572263	rs12995271	0.95	C2orf80	clu_49790-209034429-209035669	-0.35 (0.1)	0.000483	-0.29 (0.07)	0.000133	-0.31 (0.06)	4.81e-06	0.00055
2q33.3	rs7572263	rs7583625	0.96	C2orf80	clu_49790-209034429-209035669	-0.35 (0.1)	0.000483	-0.29 (0.07)	0.000133	-0.31 (0.06)	4.81e-06	0.00055
2q33.3	rs7572263	rs35789824	0.95	C2orf80	clu_49790-209030539-209036712	-0.31 (0.09)	0.000942	-0.33 (0.08)	7.23e-05	-0.32 (0.06)	4.65e-06	0.00055
2q33.3	rs7572263	rs12995271	0.95	C2orf80	clu_49790-209030539-209036712	0.31 (0.09)	0.00115	0.33 (0.08)	5.96e-05	0.32 (0.06)	4.67e-06	0.00055
2q33.3	rs7572263	rs7583625	0.96	C2orf80	clu_49790-209030539-209036712	0.31 (0.09)	0.00115	0.33 (0.08)	5.96e-05	0.32 (0.06)	4.67e-06	0.00055
2q33.3	rs7572263	rs6725512	0.97	C2orf80	clu_49790-209030539-209036712	0.31 (0.09)	0.00115	0.33 (0.08)	7.11e-05	0.32 (0.06)	5.61e-06	0.00055
2q33.3	rs7572263	rs6710217	0.97	C2orf80	clu_49790-209030539-209036712	0.3 (0.09)	0.00165	0.33 (0.08)	8.8e-05	0.31 (0.06)	1.01e-05	0.000899
2q33.3	rs7572263	rs7596783	0.21	C2orf80	clu_49790-209030539-209033106	-0.49 (0.16)	0.0021	-0.39 (0.14)	0.00775	-0.44 (0.11)	0.00125	0.0455
2q33.3	rs7572263	rs10804167	0.95	C2orf80	clu_49790-209030539-209033106	0.47 (0.11)	2.98e-05	0.16 (0.1)	0.11	0.3 (0.07)	0.00138	0.0476
2q33.3	rs7572263	rs12995271	0.95	C2orf80	clu_49792-209047771-209048618	-0.42 (0.06)	5.58e-11	-0.3 (0.04)	1.13e-11	-0.33 (0.03)	2.3e-22	7.05e-20
2q33.3	rs7572263	rs7583625	0.96	C2orf80	clu_49792-209047771-209048618	-0.42 (0.06)	5.58e-11	-0.3 (0.04)	1.13e-11	-0.33 (0.03)	2.3e-22	7.05e-20
2q33.3	rs7572263	rs6725512	0.97	C2orf80	clu_49792-209047771-209048618	-0.42 (0.06)	5.58e-11	-0.3 (0.04)	8.67e-14	-0.33 (0.03)	2.31e-22	7.05e-20
2q33.3	rs7572263	rs35789824	0.95	C2orf80	clu_49792-209047771-209048618	0.42 (0.06)	4.12e-11	0.3 (0.04)	1.58e-11	0.33 (0.03)	2.88e-22	7.05e-20
2q33.3	rs7572263	rs6710217	0.97	C2orf80	clu_49792-209047771-209048618	-0.4 (0.06)	3.44e-10	-0.3 (0.04)	3.22e-14	-0.33 (0.03)	4.52e-22	8.85e-20
2q33.3	rs7572263	rs7572263	1	C2orf80	clu_49792-209047771-209054677	-0.56 (0.08)	3.46e-11	-0.16 (0.04)	9.15e-05	-0.24 (0.04)	6.63e-10	1.62e-08
2q33.3	rs7572263	rs6725512	0.97	C2orf80	clu_49792-209047771-209054677	-0.55 (0.08)	1.23e-10	-0.16 (0.04)	0.000159	-0.24 (0.04)	3.07e-09	7.34e-08
2q33.3	rs7572263	rs6710217	0.97	C2orf80	clu_49792-209047771-209054677	-0.54 (0.08)	2.36e-10	-0.16 (0.04)	0.000127	-0.24 (0.04)	3.29e-09	7.67e-08
2q33.3	rs7572263	rs10804167	0.95	C2orf80	clu_49792-209047771-209054677	0.55 (0.08)	1.39e-10	0.16 (0.04)	0.000157	0.23 (0.04)	3.66e-09	8.27e-08
2q33.3	rs7572263	rs12995271	0.95	C2orf80	clu_49792-209047771-209054677	-0.55 (0.08)	1.23e-10	-0.16 (0.04)	0.000181	-0.23 (0.04)	3.8e-09	8.27e-08
2q33.3	rs7572263	rs6725512	0.97	C2orf80	clu_49792-209048778-209049675	-0.19 (0.08)	0.0143	-0.24 (0.04)	6.49e-07	-0.23 (0.04)	2.04e-07	3.93e-06
2q33.3	rs7572263	rs6710217	0.97	C2orf80	clu_49792-209048778-209049675	-0.18 (0.08)	0.0211	-0.24 (0.04)	5.49e-07	-0.22 (0.04)	2.55e-07	4.8e-06
2q33.3	rs7572263	rs12995271	0.95	C2orf80	clu_49792-209048778-209049675	-0.19 (0.08)	0.0143	-0.23 (0.04)	1.17e-06	-0.22 (0.04)	4.22e-07	7.66e-06
2q33.3	rs7572263	rs7583625	0.96	C2orf80	clu_49792-209048778-209049675	-0.19 (0.08)	0.0143	-0.23 (0.04)	1.17e-06	-0.22 (0.04)	4.22e-07	7.66e-06
2q33.3	rs7572263	rs35789824	0.95	C2orf80	clu_49792-209048778-209049675	0.2 (0.08)	0.0133	0.23 (0.04)	1.78e-06	0.22 (0.04)	6.33e-07	1.11e-05
3p14.1	rs11706832	rs813636	0.23	SLC25A26	clu_44160-66313803-66354877	0.99 (0.07)	2.67e-30	0.88 (0.07)	9.17e-25	0.93 (0.05)	8.88e-77	3.75e-74
3p14.1	rs11706832	rs782724	0.24	SLC25A26	clu_44160-66313803-66354877	0.99 (0.07)	1.05e-30	0.86 (0.07)	1.29e-23	0.92 (0.05)	6.46e-75	9.59e-73
3p14.1	rs11706832	rs1084530	0.24	SLC25A26	clu_44160-66313803-66354877	0.99 (0.07)	1.1e-30	0.86 (0.07)	1.29e-23	0.92 (0.05)	6.82e-75	9.59e-73
3p14.1	rs11706832	rs782743	0.24	SLC25A26	clu_44160-66313803-66354877	0.98 (0.07)	9.34e-30	0.87 (0.07)	3.31e-23	0.92 (0.05)	4e-72	4.22e-70
3p14.1	rs11706832	rs332348	0.23	SLC25A26	clu_44160-66313803-66354877	0.98 (0.07)	4.62e-29	0.85 (0.07)	1.43e-22	0.91 (0.05)	2.29e-69	1.93e-67
3p14.1	rs11706832	rs332376	0.4	SLC25A26	clu_44160-66313803-66413284	-0.5 (0.1)	1.02e-06	-0.35 (0.08)	1.4e-05	-0.4 (0.06)	7.79e-10	1.26e-08
3p14.1	rs11706832	rs332370	0.43	SLC25A26	clu_44160-66313803-66413284	-0.48 (0.09)	5.19e-07	-0.33 (0.08)	3.41e-05	-0.39 (0.06)	1.05e-09	1.64e-08
3p14.1	rs11706832	rs332381	0.44	SLC25A26	clu_44160-66313803-66413284	-0.45 (0.09)	3.77e-06	-0.4 (0.09)	1.44e-05	-0.42 (0.06)	1.25e-09	1.89e-08
3p14.1	rs11706832	rs332371	0.44	SLC25A26	clu_44160-66313803-66413284	-0.48 (0.09)	6.97e-07	-0.33 (0.08)	3.41e-05	-0.39 (0.06)	1.38e-09	2.01e-08
3p14.1	rs11706832	rs332377	0.39	SLC25A26	clu_44160-66313803-66413284	-0.49 (0.1)	2.11e-06	-0.35 (0.08)	1.76e-05	-0.4 (0.06)	2.09e-09	2.85e-08
3p14.1	rs11706832	rs813636	0.23	SLC25A26	clu_44160-66313803-66396788	-0.15 (0.08)	0.0544	-0.46 (0.07)	2.1e-09	-0.33 (0.05)	1.95e-08	2.35e-07
3p14.1	rs11706832	rs332348	0.23	SLC25A26	clu_44160-66313803-66396788	-0.17 (0.08)	0.0374	-0.43 (0.07)	3.63e-08	-0.31 (0.05)	1.75e-07	1.9e-06
3p14.1	rs11706832	rs782743	0.24	SLC25A26	clu_44160-66313803-66396788	-0.16 (0.08)	0.0487	-0.43 (0.07)	4e-08	-0.31 (0.05)	3.52e-07	3.72e-06
3p14.1	rs11706832	rs782724	0.24	SLC25A26	clu_44160-66313803-66396788	-0.15 (0.08)	0.0554	-0.43 (0.07)	4.11e-08	-0.3 (0.05)	4.16e-07	4.14e-06
3p14.1	rs11706832	rs1084530	0.24	SLC25A26	clu_44160-66313803-66396788	-0.15 (0.08)	0.0553	-0.43 (0.07)	4.11e-08	-0.3 (0.05)	4.22e-07	4.14e-06
3p14.1	rs11706832	rs707010	0.22	SLC25A26	clu_44160-66271553-66293627	-0.26 (0.08)	0.000824	-0.43 (0.1)	1.74e-05	-0.32 (0.06)	1.53e-06	1.43e-05
3p14.1	rs11706832	rs782751	0.24	SLC25A26	clu_44160-66271553-66293627	-0.24 (0.08)	0.00196	-0.43 (0.1)	3.67e-05	-0.31 (0.06)	9.7e-06	8.9e-05
3p14.1	rs11706832	rs332348	0.23	SLC25A26	clu_44160-66271553-66293627	-0.25 (0.08)	0.00125	-0.4 (0.1)	0.000125	-0.3 (0.06)	1.54e-05	0.000127
3p14.1	rs11706832	rs813636	0.23	SLC25A26	clu_44160-66271553-66293627	-0.23 (0.08)	0.00283	-0.42 (0.1)	5.09e-05	-0.3 (0.06)	2.03e-05	0.000161
3p14.1	rs11706832	rs782743	0.24	SLC25A26	clu_44160-66271553-66293627	-0.22 (0.08)	0.00425	-0.41 (0.1)	7.85e-05	-0.29 (0.06)	4.88e-05	0.000359
3p14.1	rs11706832	rs332348	0.23	SLC25A26	clu_44160-66271553-66286968	0.31 (0.07)	3.28e-05	0.19 (0.09)	0.0381	0.27 (0.06)	8.87e-05	0.000614
3p14.1	rs11706832	rs782751	0.24	SLC25A26	clu_44160-66271553-66286968	0.29 (0.07)	0.000108	0.22 (0.09)	0.0192	0.26 (0.06)	0.000119	0.000798
3p14.1	rs11706832	rs813636	0.23	SLC25A26	clu_44160-66271553-66286968	0.29 (0.07)	7.63e-05	0.2 (0.09)	0.0349	0.26 (0.06)	0.000167	0.00104
3p14.1	rs11706832	rs782724	0.24	SLC25A26	clu_44160-66271553-66286968	0.28 (0.07)	0.000182	0.21 (0.09)	0.0264	0.25 (0.06)	0.000268	0.00157
3p14.1	rs11706832	rs707010	0.22	SLC25A26	clu_44160-66271553-66286968	0.27 (0.08)	0.000464	0.23 (0.09)	0.0111	0.25 (0.06)	0.000273	0.00158
3p14.1	rs11706832	rs782724	0.24	SLC25A26	clu_44160-66293736-66312475	-0.13 (0.05)	0.00443	-0.24 (0.06)	0.000221	-0.17 (0.04)	0.000117	0.000797
3p14.1	rs11706832	rs1084530	0.24	SLC25A26	clu_44160-66293736-66312475	-0.13 (0.05)	0.00524	-0.24 (0.06)	0.000221	-0.17 (0.04)	0.000144	0.000909
3p14.1	rs11706832	rs782751	0.24	SLC25A26	clu_44160-66293736-66312475	-0.12 (0.05)	0.00861	-0.24 (0.06)	0.000217	-0.17 (0.04)	0.00025	0.00149
3p14.1	rs11706832	rs332348	0.23	SLC25A26	clu_44160-66293736-66312475	-0.11 (0.05)	0.0164	-0.25 (0.06)	6.58e-05	-0.16 (0.04)	0.000333	0.0018
3p14.1	rs11706832	rs782743	0.24	SLC25A26	clu_44160-66293736-66312475	-0.13 (0.05)	0.0056	-0.22 (0.06)	0.00072	-0.16 (0.04)	0.000396	0.00212
3p14.1	rs11706832	rs1091584	0.52	SLC25A26	clu_44160-66313803-66419902	-0.27 (0.1)	0.00609	-0.18 (0.07)	0.0131	-0.21 (0.06)	0.00474	0.023
7p11.2	rs723527	rs2699247	0.03	SEC61G	clu_32096-54825287-54826851	0.59 (0.1)	2.61e-09	0.35 (0.07)	7.15e-06	0.44 (0.06)	8.51e-13	1.7e-10
7p11.2	rs723527	rs2709328	0.02	SEC61G	clu_32096-54825287-54826851	0.58 (0.1)	1.59e-08	0.35 (0.07)	9.03e-06	0.43 (0.06)	6.69e-12	6.69e-10
7p11.2	rs723527	rs7458480	0.02	SEC61G	clu_32096-54825287-54826851	-0.57 (0.1)	3.68e-08	-0.34 (0.07)	1.26e-05	-0.42 (0.06)	2.46e-11	1.64e-09
7p11.2	rs723527	rs13438685	0.03	SEC61G	clu_32096-54825287-54826851	-0.41 (0.13)	0.00128	-0.32 (0.09)	0.000483	-0.35 (0.07)	1.84e-05	0.000459
7p11.2	rs723527	rs56329596	0.02	SEC61G	clu_32096-54825287-54826851	-0.35 (0.12)	0.00462	-0.29 (0.09)	0.000836	-0.31 (0.07)	0.000102	0.00226
7p11.2	rs723527	rs2699247	0.03	SEC61G	clu_32096-54825287-54826855	-0.53 (0.09)	2.3e-08	-0.3 (0.07)	4.05e-05	-0.39 (0.06)	7.23e-11	3.62e-09
7p11.2	rs723527	rs2709328	0.02	SEC61G	clu_32096-54825287-54826855	-0.53 (0.09)	5.6e-08	-0.29 (0.07)	6.96e-05	-0.38 (0.06)	3.66e-10	1.47e-08
7p11.2	rs723527	rs7458480	0.02	SEC61G	clu_32096-54825287-54826855	0.53 (0.1)	8.65e-08	0.29 (0.07)	7.64e-05	0.37 (0.06)	6.65e-10	2.22e-08
7p11.2	rs723527	rs13438685	0.03	SEC61G	clu_32096-54825287-54826855	0.43 (0.12)	0.000382	0.29 (0.08)	0.000691	0.33 (0.07)	1.07e-05	0.000307
7p11.2	rs723527	rs56329596	0.02	SEC61G	clu_32096-54825287-54826855	0.38 (0.12)	0.00113	0.23 (0.08)	0.00411	0.28 (0.07)	0.000206	0.00412
7p11.2	rs723527	rs984654	0.49	EGFR	clu_32100-55225446-55231426	-0.13 (0.08)	0.119	-0.18 (0.05)	0.000438	-0.17 (0.04)	0.000561	0.0363
7p11.2	rs723527	rs6978771	0.48	EGFR	clu_32100-55225446-55231426	-0.12 (0.08)	0.127	-0.18 (0.05)	0.000508	-0.16 (0.04)	0.000688	0.0363
7p11.2	rs723527	rs3735064	0.48	EGFR	clu_32100-55225446-55231426	-0.12 (0.08)	0.133	-0.18 (0.05)	0.000508	-0.16 (0.04)	0.000718	0.0363
7p11.2	rs723527	rs9642564	0.48	EGFR	clu_32100-55225446-55231426	-0.12 (0.08)	0.135	-0.18 (0.05)	0.000508	-0.16 (0.04)	0.00073	0.0363
7p11.2	rs723527	rs3800827	0.49	EGFR	clu_32100-55225446-55231426	-0.12 (0.08)	0.122	-0.18 (0.05)	0.000632	-0.16 (0.04)	0.000824	0.0363
7p11.2	rs75061358	rs2699247	0.07	SEC61G	clu_32096-54825287-54826851	0.59 (0.1)	2.61e-09	0.35 (0.07)	7.15e-06	0.44 (0.06)	8.51e-13	1.7e-10
7p11.2	rs75061358	rs2709328	0.07	SEC61G	clu_32096-54825287-54826851	0.58 (0.1)	1.59e-08	0.35 (0.07)	9.03e-06	0.43 (0.06)	6.69e-12	6.69e-10
7p11.2	rs75061358	rs7458480	0.07	SEC61G	clu_32096-54825287-54826851	-0.57 (0.1)	3.68e-08	-0.34 (0.07)	1.26e-05	-0.42 (0.06)	2.46e-11	1.64e-09
7p11.2	rs75061358	rs13438685	0.17	SEC61G	clu_32096-54825287-54826851	-0.41 (0.13)	0.00128	-0.32 (0.09)	0.000483	-0.35 (0.07)	1.84e-05	0.000459
7p11.2	rs75061358	rs56329596	0.17	SEC61G	clu_32096-54825287-54826851	-0.35 (0.12)	0.00462	-0.29 (0.09)	0.000836	-0.31 (0.07)	0.000102	0.00226
7p11.2	rs75061358	rs2699247	0.07	SEC61G	clu_32096-54825287-54826855	-0.53 (0.09)	2.3e-08	-0.3 (0.07)	4.05e-05	-0.39 (0.06)	7.23e-11	3.62e-09
7p11.2	rs75061358	rs2709328	0.07	SEC61G	clu_32096-54825287-54826855	-0.53 (0.09)	5.6e-08	-0.29 (0.07)	6.96e-05	-0.38 (0.06)	3.66e-10	1.47e-08
7p11.2	rs75061358	rs7458480	0.07	SEC61G	clu_32096-54825287-54826855	0.53 (0.1)	8.65e-08	0.29 (0.07)	7.64e-05	0.37 (0.06)	6.65e-10	2.22e-08
7p11.2	rs75061358	rs13438685	0.17	SEC61G	clu_32096-54825287-54826855	0.43 (0.12)	0.000382	0.29 (0.08)	0.000691	0.33 (0.07)	1.07e-05	0.000307
7p11.2	rs75061358	rs56329596	0.17	SEC61G	clu_32096-54825287-54826855	0.38 (0.12)	0.00113	0.23 (0.08)	0.00411	0.28 (0.07)	0.000206	0.00412
7p11.2	rs75061358	rs984654	0.04	EGFR	clu_32100-55225446-55231426	-0.13 (0.08)	0.119	-0.18 (0.05)	0.000438	-0.17 (0.04)	0.000561	0.0363
7p11.2	rs75061358	rs6978771	0.04	EGFR	clu_32100-55225446-55231426	-0.12 (0.08)	0.127	-0.18 (0.05)	0.000508	-0.16 (0.04)	0.000688	0.0363
7p11.2	rs75061358	rs3735064	0.04	EGFR	clu_32100-55225446-55231426	-0.12 (0.08)	0.133	-0.18 (0.05)	0.000508	-0.16 (0.04)	0.000718	0.0363
7p11.2	rs75061358	rs9642564	0.04	EGFR	clu_32100-55225446-55231426	-0.12 (0.08)	0.135	-0.18 (0.05)	0.000508	-0.16 (0.04)	0.00073	0.0363
7p11.2	rs75061358	rs3800827	0.04	EGFR	clu_32100-55225446-55231426	-0.12 (0.08)	0.122	-0.18 (0.05)	0.000632	-0.16 (0.04)	0.000824	0.0363
11q23.3	rs12803321	rs11216924	0.22	TMEM25	clu_9404-118412790-118416834	0.33 (0.09)	0.00051	0.33 (0.05)	4.23e-09	0.33 (0.05)	8.51e-12	1.3e-09
11q23.3	rs12803321	rs11216904	0.23	TMEM25	clu_9404-118412790-118416834	0.32 (0.09)	0.000458	0.33 (0.05)	1.14e-08	0.33 (0.05)	2.77e-11	1.3e-09
11q23.3	rs12803321	rs10709858	0.22	TMEM25	clu_9404-118412790-118416834	0.33 (0.09)	0.000486	0.33 (0.05)	1.06e-08	0.33 (0.05)	2.81e-11	1.3e-09
11q23.3	rs12803321	rs11216926	0.22	TMEM25	clu_9404-118412790-118416834	0.32 (0.09)	0.000532	0.33 (0.05)	1.06e-08	0.33 (0.05)	3.08e-11	1.3e-09
11q23.3	rs12803321	rs57438673	0.22	TMEM25	clu_9404-118412790-118416834	0.32 (0.09)	0.000547	0.33 (0.05)	1.06e-08	0.33 (0.05)	3.16e-11	1.3e-09
11q23.3	rs12803321	rs73023341	0.23	TMEM25	clu_9404-118405070-118419942	0.28 (0.06)	2.83e-06	0.16 (0.04)	0.000174	0.2 (0.03)	7.13e-08	1.17e-06
11q23.3	rs12803321	rs59108310	0.22	TMEM25	clu_9404-118405070-118419942	0.25 (0.06)	3.3e-05	0.17 (0.04)	0.000121	0.19 (0.03)	2.82e-07	4.54e-06
11q23.3	rs12803321	rs17092756	0.23	TMEM25	clu_9404-118405070-118419942	0.25 (0.06)	3.19e-05	0.16 (0.04)	0.000133	0.19 (0.03)	3.07e-07	4.83e-06
11q23.3	rs12803321	rs73023350	0.2	TMEM25	clu_9404-118405070-118419942	0.25 (0.06)	2.18e-05	0.16 (0.04)	0.000174	0.19 (0.03)	3.51e-07	5.23e-06
11q23.3	rs12803321	rs11216897	0.22	TMEM25	clu_9404-118405070-118419942	0.25 (0.06)	3.3e-05	0.16 (0.04)	0.000146	0.19 (0.03)	3.8e-07	5.23e-06
11q23.3	rs12803321	rs477106	0.23	TMEM25	clu_9404-118405070-118406223	0.2 (0.06)	0.00214	0.26 (0.07)	0.00035	0.23 (0.05)	3.55e-05	0.000293
11q23.3	rs12803321	rs573971	0.22	TMEM25	clu_9404-118405070-118406223	0.19 (0.06)	0.00194	0.22 (0.07)	0.00246	0.2 (0.05)	0.000195	0.00142
11q23.3	rs12803321	rs572126	0.22	TMEM25	clu_9404-118405070-118406223	0.19 (0.06)	0.00262	0.22 (0.07)	0.00254	0.2 (0.05)	0.000268	0.00177
11q23.3	rs12803321	rs537975	0.22	TMEM25	clu_9404-118405070-118406223	0.19 (0.06)	0.00297	0.22 (0.07)	0.00254	0.2 (0.05)	0.000306	0.00197
11q23.3	rs12803321	rs10892245	0.23	TMEM25	clu_9404-118405070-118406223	-0.17 (0.07)	0.0209	-0.32 (0.08)	0.000187	-0.23 (0.05)	0.000328	0.0021
11q23.3	rs12803321	rs4326835	0.22	TMEM25	clu_9404-118405070-118412657	0.13 (0.07)	0.0929	0.18 (0.04)	1.7e-05	0.17 (0.04)	8.12e-05	0.000659
11q23.3	rs12803321	rs60837962	0.22	TMEM25	clu_9404-118405070-118412657	0.12 (0.08)	0.103	0.18 (0.04)	1.7e-05	0.17 (0.04)	8.92e-05	0.000717
11q23.3	rs12803321	rs17122278	0.22	TMEM25	clu_9404-118405070-118412657	0.12 (0.08)	0.105	0.18 (0.04)	1.7e-05	0.17 (0.04)	9.17e-05	0.000729
11q23.3	rs12803321	rs2277291	0.22	TMEM25	clu_9404-118405070-118412657	0.12 (0.08)	0.108	0.18 (0.04)	1.7e-05	0.17 (0.04)	9.45e-05	0.00073
11q23.3	rs12803321	rs17122269	0.22	TMEM25	clu_9404-118405070-118412657	0.12 (0.08)	0.108	0.18 (0.04)	1.7e-05	0.17 (0.04)	9.45e-05	0.00073
11q23.3	rs12803321	rs61900957	0.16	TMEM25	clu_9432-118402586-118402961	0.29 (0.12)	0.0179	0.76 (0.11)	2.5e-10	0.55 (0.08)	2.54e-10	1.17e-07
11q23.3	rs12803321	rs629470	0.17	TMEM25	clu_9432-118402586-118402961	0.19 (0.1)	0.0588	0.52 (0.11)	3.19e-06	0.35 (0.07)	2.28e-05	0.00263
11q23.3	rs12803321	rs61900957	0.16	TMEM25	clu_9432-118402586-118402865	-0.22 (0.15)	0.149	-0.77 (0.11)	2.24e-10	-0.58 (0.09)	1.24e-09	2.84e-07
11q23.3	rs12803321	rs629470	0.17	TMEM25	clu_9432-118402586-118402865	-0.2 (0.13)	0.112	-0.57 (0.1)	3.55e-07	-0.42 (0.08)	2.7e-06	0.000415
11q23.3	rs12803321	rs477106	0.23	TMEM25	clu_9432-118402586-118402865	0.16 (0.12)	0.177	0.44 (0.1)	1.58e-05	0.33 (0.08)	0.000157	0.0144
11q23.3	rs12803321	rs3132828	0.04	IFT46	clu_9435-118427760-118430500	-0.46 (0.11)	1.99e-05	-0.27 (0.07)	0.000267	-0.34 (0.06)	2.17e-07	7.5e-05
11q23.3	rs12803321	rs4938513	0.21	IFT46	clu_9435-118427760-118430500	-0.33 (0.09)	0.000464	-0.17 (0.08)	0.0322	-0.23 (0.06)	0.000533	0.0263
11q23.3	rs12803321	rs633308	0.21	IFT46	clu_9435-118427760-118430500	-0.35 (0.09)	0.000247	-0.15 (0.08)	0.0535	-0.23 (0.06)	0.000695	0.0263
11q23.3	rs12803321	rs11216922	0.23	IFT46	clu_9435-118427760-118430500	-0.45 (0.13)	0.000772	-0.21 (0.11)	0.0614	-0.31 (0.09)	0.00154	0.0263
11q23.3	rs12803321	rs12224844	0.23	IFT46	clu_9435-118427760-118430500	-0.44 (0.13)	0.00103	-0.21 (0.11)	0.0612	-0.31 (0.09)	0.00184	0.0263
11q23.3	rs12803321	rs3132828	0.04	IFT46	clu_9435-118428605-118430500	0.35 (0.11)	0.00111	0.25 (0.07)	0.000385	0.28 (0.06)	8.38e-06	0.00145
11q23.3	rs12803321	rs633308	0.21	IFT46	clu_9435-118428605-118430500	0.31 (0.09)	0.000782	0.16 (0.07)	0.0264	0.21 (0.06)	0.000725	0.0263
11q23.3	rs12803321	rs4938513	0.21	IFT46	clu_9435-118428605-118430500	0.28 (0.09)	0.00253	0.14 (0.07)	0.0464	0.19 (0.06)	0.00305	0.0302
11q23.3	rs12803321	rs11216922	0.23	IFT46	clu_9435-118428605-118430500	0.28 (0.13)	0.0381	0.28 (0.1)	0.00821	0.28 (0.08)	0.00363	0.0302
11q23.3	rs12803321	rs12224844	0.23	IFT46	clu_9435-118428605-118430500	0.27 (0.13)	0.0455	0.28 (0.1)	0.0074	0.28 (0.08)	0.00385	0.0302
11q23.3	rs12803321	rs3132828	0.04	IFT46	clu_9435-118427760-118428453	0.33 (0.11)	0.00201	0.21 (0.07)	0.00159	0.24 (0.06)	7.78e-05	0.00895
11q23.3	rs12803321	rs542266	0.25	IFT46	clu_9435-118427760-118428453	0.19 (0.09)	0.0455	0.16 (0.07)	0.0159	0.17 (0.05)	0.00812	0.0394
11q23.3	rs12803321	rs11216922	0.23	IFT46	clu_9435-118427760-118428453	0.39 (0.13)	0.00324	0.16 (0.1)	0.122	0.25 (0.08)	0.0113	0.0423
11q23.3	rs12803321	rs12224844	0.23	IFT46	clu_9435-118427760-118428453	0.39 (0.13)	0.00386	0.16 (0.1)	0.122	0.25 (0.08)	0.0124	0.0423
11q23.3	rs12803321	rs7126175	0.23	IFT46	clu_9435-118427760-118428453	0.38 (0.13)	0.00411	0.16 (0.1)	0.118	0.24 (0.08)	0.0125	0.0423
11q23.3	rs12803321	rs3132828	0.04	IFT46	clu_9436-118431133-118435680	0.87 (0.1)	3.31e-15	0.65 (0.06)	7.57e-22	0.7 (0.05)	2.25e-45	5.31e-43
11q23.3	rs12803321	rs4938513	0.21	IFT46	clu_9436-118431133-118435680	0.58 (0.1)	6.73e-09	0.43 (0.07)	2.3e-08	0.48 (0.06)	4.04e-16	3.18e-14
11q23.3	rs12803321	rs633308	0.21	IFT46	clu_9436-118431133-118435680	0.59 (0.09)	1.73e-09	0.39 (0.07)	2.46e-07	0.47 (0.06)	3e-15	1.77e-13
11q23.3	rs12803321	rs542266	0.25	IFT46	clu_9436-118431133-118435680	0.41 (0.1)	5.93e-05	0.37 (0.07)	1.24e-06	0.39 (0.06)	4.29e-10	1.45e-08
11q23.3	rs12803321	rs525549	0.12	IFT46	clu_9436-118431133-118435680	-0.24 (0.11)	0.0268	-0.22 (0.08)	0.00794	-0.23 (0.06)	0.00179	0.0469
11q23.3	rs12803321	rs3132828	0.04	IFT46	clu_9436-118430579-118435680	-0.85 (0.11)	5.75e-13	-0.67 (0.06)	2.93e-20	-0.72 (0.05)	2.66e-39	3.14e-37
11q23.3	rs12803321	rs4938513	0.21	IFT46	clu_9436-118430579-118435680	-0.54 (0.1)	3.05e-07	-0.42 (0.08)	4.87e-07	-0.46 (0.06)	8.99e-13	4.24e-11
11q23.3	rs12803321	rs633308	0.21	IFT46	clu_9436-118430579-118435680	-0.57 (0.1)	6.64e-08	-0.39 (0.08)	1.79e-06	-0.45 (0.06)	1.25e-12	4.93e-11
11q23.3	rs12803321	rs542266	0.25	IFT46	clu_9436-118430579-118435680	-0.34 (0.11)	0.00166	-0.36 (0.08)	1.39e-05	-0.35 (0.06)	1.84e-07	5.44e-06
11q23.3	rs12803321	rs7125115	0.9	PHLDB1	clu_9440-118484165-118484531	0.83 (0.08)	9.52e-22	0.59 (0.06)	3.45e-16	0.68 (0.05)	3.53e-44	5.51e-41
11q23.3	rs12803321	rs5795129	0.6	PHLDB1	clu_9440-118484165-118484531	-0.77 (0.08)	3.06e-20	-0.52 (0.06)	1.16e-12	-0.62 (0.05)	1.24e-35	7.15e-33
11q23.3	rs12803321	rs480958	0.69	PHLDB1	clu_9440-118484165-118484531	-0.81 (0.08)	3.44e-20	-0.54 (0.07)	1.66e-12	-0.66 (0.05)	1.37e-35	7.15e-33
11q23.3	rs12803321	rs483598	0.6	PHLDB1	clu_9440-118484165-118484531	-0.77 (0.08)	2.79e-20	-0.5 (0.06)	4.44e-12	-0.61 (0.05)	1.28e-34	2.6e-32
11q23.3	rs12803321	rs613243	0.6	PHLDB1	clu_9440-118484165-118484531	-0.77 (0.08)	2.79e-20	-0.5 (0.06)	4.44e-12	-0.61 (0.05)	1.28e-34	2.6e-32
11q23.3	rs12803321	rs7125115	0.9	PHLDB1	clu_9440-118478414-118484531	-0.79 (0.09)	9.1e-16	-0.57 (0.06)	2.55e-15	-0.64 (0.05)	2.72e-35	1.06e-32
11q23.3	rs12803321	rs12225399	0.97	PHLDB1	clu_9440-118478414-118484531	-0.81 (0.1)	5.4e-15	-0.54 (0.07)	1.99e-12	-0.63 (0.06)	1.12e-28	1.34e-26
11q23.3	rs12803321	rs67307131	0.98	PHLDB1	clu_9440-118478414-118484531	-0.8 (0.1)	1.06e-14	-0.52 (0.07)	1.26e-11	-0.62 (0.06)	5.57e-27	3.78e-25
11q23.3	rs12803321	rs5795129	0.6	PHLDB1	clu_9440-118478414-118484531	0.72 (0.09)	1.7e-14	0.49 (0.07)	4.17e-11	0.57 (0.05)	5.7e-26	3.3e-24
11q23.3	rs12803321	rs480958	0.69	PHLDB1	clu_9440-118478414-118484531	0.75 (0.09)	5.17e-14	0.52 (0.07)	4.09e-11	0.6 (0.06)	1.13e-25	6.29e-24
11q23.3	rs12803321	rs7125115	0.9	PHLDB1	clu_9440-118481241-118484009	0.62 (0.07)	4.71e-16	0.33 (0.05)	1.51e-08	0.43 (0.04)	4.63e-23	1.85e-21
11q23.3	rs12803321	rs12225399	0.97	PHLDB1	clu_9440-118481241-118484009	0.64 (0.08)	3.25e-15	0.34 (0.05)	1.2e-08	0.44 (0.04)	3.05e-22	9.71e-21
11q23.3	rs12803321	rs67307131	0.98	PHLDB1	clu_9440-118481241-118484009	0.63 (0.08)	5.98e-15	0.32 (0.06)	1.07e-07	0.43 (0.04)	1.65e-20	3.84e-19
11q23.3	rs12803321	rs5795129	0.6	PHLDB1	clu_9440-118481241-118484009	-0.54 (0.07)	5.38e-13	-0.31 (0.05)	5.03e-08	-0.39 (0.04)	2.76e-19	3.17e-18
11q23.3	rs12803321	rs577396	0.6	PHLDB1	clu_9440-118481241-118484009	-0.54 (0.07)	5.18e-13	-0.3 (0.05)	4.96e-08	-0.39 (0.04)	2.99e-19	3.32e-18
11q23.3	rs12803321	rs7125115	0.9	PHLDB1	clu_9440-118481241-118484531	0.7 (0.08)	1.22e-16	0.32 (0.06)	6.57e-08	0.45 (0.05)	4.5e-22	1.3e-20
11q23.3	rs12803321	rs4938515	0.26	PHLDB1	clu_9440-118481241-118484531	-0.74 (0.09)	1.29e-13	-0.38 (0.06)	1.68e-09	-0.48 (0.05)	2.69e-21	7.36e-20
11q23.3	rs12803321	rs12419204	0.24	PHLDB1	clu_9440-118481241-118484531	-0.67 (0.09)	7.69e-12	-0.39 (0.06)	7.12e-09	-0.48 (0.05)	3.94e-19	4.05e-18
11q23.3	rs12803321	rs4938530	0.22	PHLDB1	clu_9440-118481241-118484531	-0.72 (0.1)	1.2e-12	-0.38 (0.06)	2.74e-08	-0.48 (0.05)	6.8e-19	6.25e-18
11q23.3	rs12803321	rs12225399	0.97	PHLDB1	clu_9440-118481241-118484531	0.71 (0.08)	2.1e-15	0.29 (0.06)	3.31e-06	0.44 (0.05)	5.34e-18	4.46e-17
11q23.3	rs12803321	rs34965103	0.24	PHLDB1	clu_9440-118478414-118484009	0.11 (0.11)	0.288	0.25 (0.06)	0.0001	0.21 (0.05)	0.000956	0.0017
11q23.3	rs12803321	rs1171461	0.24	PHLDB1	clu_9440-118478414-118484009	0.09 (0.11)	0.425	0.27 (0.07)	5.04e-05	0.22 (0.06)	0.001	0.00177
11q23.3	rs12803321	rs4938515	0.26	PHLDB1	clu_9440-118478414-118484009	0.05 (0.11)	0.671	0.27 (0.06)	2.4e-05	0.21 (0.06)	0.00106	0.00187
11q23.3	rs12803321	rs653008	0.24	PHLDB1	clu_9440-118478414-118484009	0.1 (0.11)	0.34	0.25 (0.06)	0.000103	0.21 (0.05)	0.00123	0.00216
11q23.3	rs12803321	rs601318	0.24	PHLDB1	clu_9440-118478414-118484009	0.1 (0.11)	0.344	0.25 (0.06)	0.000103	0.21 (0.05)	0.00124	0.00218
11q23.3	rs12803321	rs11217021	0.43	DDX6	clu_9452-118627996-118630631	-0.28 (0.06)	1.7e-05	-0.11 (0.05)	0.0213	-0.17 (0.04)	6.12e-05	0.00855
11q23.3	rs12803321	rs112996178	0.43	DDX6	clu_9452-118627996-118630631	-0.29 (0.06)	1.69e-05	-0.1 (0.05)	0.0244	-0.16 (0.04)	7.67e-05	0.00855
11q23.3	rs12803321	rs10892282	0.43	DDX6	clu_9452-118627996-118630631	-0.29 (0.06)	1.1e-05	-0.1 (0.05)	0.0292	-0.16 (0.04)	7.84e-05	0.00855
11q23.3	rs12803321	rs11217014	0.43	DDX6	clu_9452-118627996-118630631	-0.29 (0.06)	1.09e-05	-0.1 (0.05)	0.0308	-0.16 (0.04)	8.43e-05	0.00855
11q23.3	rs12803321	rs11217013	0.43	DDX6	clu_9452-118627996-118630631	-0.29 (0.06)	1.17e-05	-0.1 (0.05)	0.0308	-0.16 (0.04)	8.85e-05	0.00855
15q24.2	rs77633900	rs12911035	0.09	ETFA	clu_20348-76588078-76602273	-0.7 (0.06)	9.32e-27	-0.91 (0.07)	9.75e-25	-0.79 (0.04)	2.41e-68	9.27e-66
15q24.2	rs77633900	rs12439484	0.09	ETFA	clu_20348-76588078-76602273	-0.7 (0.06)	1.66e-26	-0.91 (0.07)	9.75e-25	-0.78 (0.04)	7.43e-68	9.27e-66
15q24.2	rs77633900	rs3759853	0.08	ETFA	clu_20348-76588078-76602273	-0.7 (0.06)	2.09e-26	-0.92 (0.07)	1.03e-24	-0.79 (0.04)	8.93e-68	9.27e-66
15q24.2	rs77633900	rs4381566	0.08	ETFA	clu_20348-76588078-76602273	-0.7 (0.06)	2.09e-26	-0.92 (0.07)	1.03e-24	-0.79 (0.04)	8.93e-68	9.27e-66
15q24.2	rs77633900	rs34893715	0.08	ETFA	clu_20348-76588078-76602273	-0.7 (0.06)	2.04e-26	-0.92 (0.07)	1.03e-24	-0.79 (0.04)	9.17e-68	9.27e-66
15q24.2	rs77633900	rs12439484	0.09	ETFA	clu_20348-76602405-76603691	-0.92 (0.08)	3.09e-24	-0.74 (0.07)	1.35e-19	-0.82 (0.05)	8.33e-54	1.77e-52
15q24.2	rs77633900	rs17361504	0.09	ETFA	clu_20348-76602405-76603691	-0.91 (0.08)	3.25e-24	-0.74 (0.07)	1.63e-19	-0.82 (0.05)	1.13e-53	2.32e-52
15q24.2	rs77633900	rs12911035	0.09	ETFA	clu_20348-76602405-76603691	-0.91 (0.08)	5.29e-24	-0.74 (0.07)	1.35e-19	-0.82 (0.05)	1.96e-53	3.91e-52
15q24.2	rs77633900	rs3759853	0.08	ETFA	clu_20348-76602405-76603691	-0.91 (0.08)	1.12e-23	-0.75 (0.07)	9.32e-20	-0.82 (0.05)	2.77e-53	5.21e-52
15q24.2	rs77633900	rs4381566	0.08	ETFA	clu_20348-76602405-76603691	-0.91 (0.08)	1.12e-23	-0.75 (0.07)	9.32e-20	-0.82 (0.05)	2.77e-53	5.21e-52
15q24.2	rs77633900	rs34213321	0.08	ETFA	clu_20348-76588078-76603691	0.32 (0.08)	5.68e-05	0.39 (0.07)	2.3e-07	0.36 (0.05)	1.36e-10	1.31e-09
15q24.2	rs77633900	rs2469542	0.08	ETFA	clu_20348-76588078-76603691	-0.32 (0.08)	7.23e-05	-0.38 (0.07)	2.43e-07	-0.36 (0.05)	1.87e-10	1.75e-09
15q24.2	rs77633900	rs2456076	0.08	ETFA	clu_20348-76588078-76603691	-0.32 (0.08)	7.23e-05	-0.38 (0.07)	2.43e-07	-0.36 (0.05)	1.87e-10	1.75e-09
15q24.2	rs77633900	rs2139190	0.08	ETFA	clu_20348-76588078-76603691	0.32 (0.08)	5.75e-05	0.38 (0.07)	3.3e-07	0.35 (0.05)	2.05e-10	1.9e-09
15q24.2	rs77633900	rs869452	0.08	ETFA	clu_20348-76588078-76603691	-0.32 (0.08)	6.65e-05	-0.38 (0.07)	3.14e-07	-0.36 (0.05)	2.31e-10	2.11e-09
15q24.2	rs77633900	rs12907668	0.08	ETFA	clu_20348-76585041-76587932	0.16 (0.08)	0.0499	0.28 (0.07)	5.9e-05	0.23 (0.05)	8.84e-05	0.000519
15q24.2	rs77633900	rs12913096	0.08	ETFA	clu_20348-76585041-76587932	0.14 (0.08)	0.0765	0.3 (0.07)	3.13e-05	0.23 (0.05)	9.25e-05	0.000539
15q24.2	rs77633900	rs12908334	0.08	ETFA	clu_20348-76585041-76587932	0.16 (0.08)	0.0503	0.26 (0.06)	7.6e-05	0.22 (0.05)	0.000104	0.000602
15q24.2	rs77633900	rs12911035	0.09	ETFA	clu_20348-76585041-76587932	0.16 (0.08)	0.0514	0.26 (0.06)	7.6e-05	0.22 (0.05)	0.000108	0.00062
15q24.2	rs77633900	rs3759853	0.08	ETFA	clu_20348-76585041-76587932	0.16 (0.08)	0.0494	0.26 (0.06)	8.7e-05	0.22 (0.05)	0.000116	0.000653
16p13.3	rs2562152	rs216583	0.22	POLR3K	clu_16002-101645-103476	-0.17 (0.1)	0.0849	-0.25 (0.06)	1.11e-05	-0.23 (0.05)	2e-05	0.00205
16p13.3	rs2562152	rs1088640	0.21	POLR3K	clu_16002-101645-103476	-0.24 (0.1)	0.0137	-0.23 (0.06)	9.93e-05	-0.23 (0.05)	2.56e-05	0.00205
16p13.3	rs2562152	rs798675	0.22	POLR3K	clu_16002-101645-103476	-0.2 (0.1)	0.0387	-0.24 (0.06)	5.73e-05	-0.23 (0.05)	3.99e-05	0.00205
16p13.3	rs2562152	rs798674	0.22	POLR3K	clu_16002-101645-103476	-0.2 (0.1)	0.0408	-0.24 (0.06)	6.14e-05	-0.23 (0.05)	4.49e-05	0.00205
16p13.3	rs2562152	rs216594	0.67	POLR3K	clu_16002-101645-103476	0.31 (0.15)	0.0388	0.39 (0.1)	6.3e-05	0.37 (0.08)	4.52e-05	0.00205
16p13.3	rs2562152	rs216594	0.67	POLR3K	clu_16002-101645-103121	-0.19 (0.12)	0.119	-0.37 (0.08)	1.17e-05	-0.31 (0.07)	4.66e-05	0.00205
16p13.3	rs2562152	rs1088640	0.21	POLR3K	clu_16002-101645-103121	0.12 (0.08)	0.106	0.21 (0.05)	3.96e-05	0.19 (0.04)	9.85e-05	0.00216
16p13.3	rs2562152	rs4984743	0.45	POLR3K	clu_16002-101645-103121	0.22 (0.1)	0.0302	0.24 (0.06)	0.000205	0.24 (0.05)	0.000105	0.00216
16p13.3	rs2562152	rs12597930	0.45	POLR3K	clu_16002-101645-103121	0.22 (0.1)	0.0302	0.24 (0.07)	0.000406	0.23 (0.05)	0.000141	0.00216
16p13.3	rs2562152	rs216590	0.45	POLR3K	clu_16002-101645-103121	-0.21 (0.1)	0.0383	-0.24 (0.06)	0.000231	-0.23 (0.05)	0.000147	0.00216
16p13.3	rs3751667	rs112066513	0.29	LMF1	clu_16092-961079-984244	0.34 (0.19)	0.0671	0.83 (0.12)	6.13e-10	0.68 (0.1)	8.78e-10	3.13e-07
16p13.3	rs3751667	rs73483813	0.31	LMF1	clu_16092-961079-984244	0.26 (0.18)	0.154	0.83 (0.12)	3.26e-10	0.65 (0.1)	2.52e-09	3.13e-07
16p13.3	rs3751667	rs112866363	0.35	LMF1	clu_16092-961079-984244	0.29 (0.18)	0.118	0.83 (0.12)	6.13e-10	0.66 (0.1)	2.74e-09	3.13e-07
16p13.3	rs3751667	rs113860397	0.35	LMF1	clu_16092-961079-984244	0.29 (0.18)	0.117	0.83 (0.12)	6.13e-10	0.66 (0.1)	2.75e-09	3.13e-07
16p13.3	rs3751667	rs143872627	0.34	LMF1	clu_16092-961079-984244	0.28 (0.18)	0.124	0.83 (0.12)	6.13e-10	0.66 (0.1)	3.1e-09	3.13e-07
16p13.3	rs3751667	rs146236523	0.38	LMF1	clu_16092-961079-983991	-0.27 (0.18)	0.139	-0.58 (0.1)	5.33e-09	-0.51 (0.09)	5.76e-08	1.86e-06
16p13.3	rs3751667	rs58563096	0.33	LMF1	clu_16092-961079-983991	-0.29 (0.2)	0.153	-0.61 (0.1)	5.59e-09	-0.55 (0.09)	5.99e-08	1.89e-06
16p13.3	rs3751667	rs115494265	0.34	LMF1	clu_16092-961079-983991	-0.33 (0.21)	0.11	-0.61 (0.11)	1.1e-08	-0.55 (0.09)	7.42e-08	2.11e-06
16p13.3	rs3751667	rs549471042	0.38	LMF1	clu_16092-961079-983991	-0.27 (0.18)	0.139	-0.56 (0.1)	1.11e-08	-0.5 (0.09)	1.12e-07	2.9e-06
16p13.3	rs3751667	rs117666374	0.38	LMF1	clu_16092-961079-983991	-0.27 (0.18)	0.145	-0.56 (0.1)	1.11e-08	-0.5 (0.09)	1.2e-07	3.06e-06
16p13.3	rs3751667	rs11248958	0.3	LMF1	clu_16092-961079-981642	-0.09 (0.1)	0.402	-0.25 (0.06)	6.89e-05	-0.2 (0.05)	0.000857	0.00995
16p13.3	rs3751667	rs12447306	0.4	LMF1	clu_16092-961079-981642	-0.14 (0.1)	0.186	-0.24 (0.06)	0.000205	-0.21 (0.05)	0.00089	0.0103
16p13.3	rs3751667	rs12445470	0.39	LMF1	clu_16092-961079-981642	-0.12 (0.1)	0.245	-0.24 (0.06)	0.000205	-0.21 (0.05)	0.00123	0.0141
16p13.3	rs3751667	rs12447329	0.39	LMF1	clu_16092-961079-981642	-0.11 (0.1)	0.27	-0.24 (0.06)	0.000205	-0.2 (0.05)	0.00139	0.0158
16p13.3	rs3751667	rs3751666	0.43	LMF1	clu_16092-961079-981642	-0.11 (0.1)	0.269	-0.24 (0.06)	0.000192	-0.2 (0.05)	0.0014	0.0158
16p13.3	rs3751667	rs73497290	0.38	LMF1	clu_16092-961079-984190	0.56 (0.16)	0.000599	0.23 (0.1)	0.0327	0.33 (0.09)	0.00249	0.0228
16p13.3	rs3751667	rs116151539	0.2	LMF1	clu_16092-961079-984190	0.71 (0.2)	0.000543	0.25 (0.12)	0.0302	0.37 (0.1)	0.00306	0.0272
16p13.3	rs3751667	rs113836632	0.33	LMF1	clu_16092-961079-984190	0.59 (0.17)	0.000743	0.22 (0.1)	0.0361	0.32 (0.09)	0.00381	0.0314
16p13.3	rs3751667	rs59020951	0.32	LMF1	clu_16092-961079-984190	0.59 (0.17)	0.00078	0.22 (0.11)	0.039	0.32 (0.09)	0.00436	0.0338
16p13.3	rs3751667	rs73497294	0.32	LMF1	clu_16092-961079-984190	0.59 (0.17)	0.00088	0.22 (0.11)	0.039	0.32 (0.09)	0.00467	0.0346
16p13.3	rs3751667	rs8045859	0.38	LMF1	clu_16093-1004666-1031145	0.57 (0.13)	2.43e-05	0.52 (0.09)	7.82e-09	0.54 (0.07)	2.85e-12	3.44e-11
16p13.3	rs3751667	rs4984622	0.39	LMF1	clu_16093-1004666-1031145	0.56 (0.13)	3.24e-05	0.47 (0.08)	1.11e-08	0.49 (0.07)	7.14e-12	8.15e-11
16p13.3	rs3751667	rs12932842	0.37	LMF1	clu_16093-1004666-1031145	0.59 (0.14)	4.49e-05	0.47 (0.08)	1.11e-08	0.5 (0.07)	1.1e-11	1.23e-10
16p13.3	rs3751667	rs79541642	0.35	LMF1	clu_16093-1004666-1031145	0.58 (0.14)	6.13e-05	0.48 (0.08)	1.19e-08	0.51 (0.07)	1.42e-11	1.56e-10
16p13.3	rs3751667	rs59802517	0.38	LMF1	clu_16093-1004666-1031145	0.58 (0.13)	2.19e-05	0.47 (0.08)	2.5e-08	0.5 (0.07)	1.49e-11	1.63e-10
16p13.3	rs3751667	rs742036	0.38	LMF1	clu_16201-904706-907038	-0.09 (0.06)	0.153	-0.2 (0.04)	3.14e-07	-0.17 (0.03)	1.7e-06	0.000131
16p13.3	rs3751667	rs4984990	0.41	LMF1	clu_16201-904706-907038	-0.1 (0.06)	0.0989	-0.2 (0.04)	5.97e-07	-0.17 (0.03)	1.71e-06	0.000131
16p13.3	rs3751667	rs12600110	0.39	LMF1	clu_16201-904706-907038	-0.09 (0.06)	0.158	-0.2 (0.04)	3.14e-07	-0.17 (0.03)	1.73e-06	0.000131
16p13.3	rs3751667	rs7201247	0.41	LMF1	clu_16201-904706-907038	-0.09 (0.06)	0.148	-0.21 (0.04)	4.02e-07	-0.17 (0.03)	1.96e-06	0.000131
16p13.3	rs3751667	rs9925506	0.41	LMF1	clu_16201-904706-907038	-0.09 (0.06)	0.121	-0.2 (0.04)	5.97e-07	-0.17 (0.03)	2.22e-06	0.000131
16p13.3	rs3751667	rs34316274	0.75	LMF1	clu_16201-918097-918944	-0.1 (0.07)	0.157	-0.19 (0.04)	3.41e-07	-0.17 (0.03)	3.67e-06	0.000131
16p13.3	rs3751667	rs7201247	0.41	LMF1	clu_16201-918097-918944	-0.12 (0.06)	0.0519	-0.16 (0.03)	3.33e-06	-0.15 (0.03)	8.42e-06	0.000179
16p13.3	rs3751667	rs8054205	0.41	LMF1	clu_16201-918097-918944	-0.12 (0.06)	0.0443	-0.16 (0.03)	4.26e-06	-0.15 (0.03)	8.87e-06	0.000179
16p13.3	rs3751667	rs4984990	0.41	LMF1	clu_16201-918097-918944	-0.12 (0.06)	0.0344	-0.15 (0.03)	5.54e-06	-0.15 (0.03)	8.88e-06	0.000179
16p13.3	rs3751667	rs3751667	1	LMF1	clu_16201-918097-918944	-0.12 (0.07)	0.0782	-0.18 (0.04)	2.24e-06	-0.17 (0.03)	9.15e-06	0.000182
16p13.3	rs3751667	rs11859028	0.31	LMF1	clu_16207-919549-919963	-0.14 (0.07)	0.0532	-0.14 (0.04)	8.8e-05	-0.14 (0.03)	6.55e-05	0.0127
16p13.3	rs3751667	rs12924608	0.36	LMF1	clu_16207-919549-919963	-0.14 (0.07)	0.0434	-0.14 (0.04)	0.00018	-0.14 (0.03)	0.000117	0.0127
16p13.3	rs3751667	rs4984732	0.41	LMF1	clu_16207-919549-919963	-0.12 (0.07)	0.0793	-0.15 (0.04)	0.000154	-0.14 (0.03)	0.000179	0.0127
16p13.3	rs3751667	rs4984982	0.44	LMF1	clu_16207-919549-919963	-0.12 (0.07)	0.11	-0.15 (0.04)	0.000204	-0.14 (0.03)	0.000319	0.0127
16p13.3	rs3751667	rs4262947	0.44	LMF1	clu_16207-919549-919963	-0.1 (0.07)	0.181	-0.15 (0.04)	0.000143	-0.14 (0.03)	0.000366	0.0127
16p13.3	rs3751667	rs35660928	0.41	LMF1	clu_16207-919549-919883	-0.14 (0.07)	0.0562	-0.15 (0.05)	0.00363	-0.15 (0.04)	0.00319	0.0279
16p13.3	rs3751667	rs8062800	0.44	LMF1	clu_16207-919549-919883	-0.15 (0.07)	0.0443	-0.15 (0.05)	0.0052	-0.15 (0.04)	0.00361	0.0314
16p13.3	rs3751667	rs66814413	0.43	LMF1	clu_16207-919549-919883	-0.15 (0.07)	0.0446	-0.15 (0.05)	0.00537	-0.15 (0.04)	0.00373	0.0315
16p13.3	rs3751667	rs8054205	0.41	LMF1	clu_16207-919549-919883	-0.15 (0.07)	0.0434	-0.14 (0.05)	0.00577	-0.14 (0.04)	0.00396	0.0328
16p13.3	rs3751667	rs3751666	0.43	LMF1	clu_16207-919549-919883	-0.16 (0.07)	0.0308	-0.14 (0.05)	0.00769	-0.14 (0.04)	0.00398	0.0328
16p13.3	rs3751667	rs2187840	0.33	RP11-161M6.2	clu_16093-1029758-1031145	0.54 (0.12)	2.05e-05	1.14 (0.08)	5.84e-29	0.97 (0.07)	7.28e-45	1.18e-41
16p13.3	rs3751667	rs1978482	0.33	RP11-161M6.2	clu_16093-1029758-1031145	0.54 (0.12)	2.05e-05	1.14 (0.08)	5.84e-29	0.97 (0.07)	7.28e-45	1.18e-41
16p13.3	rs3751667	rs1978481	0.34	RP11-161M6.2	clu_16093-1029758-1031145	0.54 (0.12)	2.3e-05	1.14 (0.08)	5.84e-29	0.96 (0.07)	9.2e-45	1.18e-41
16p13.3	rs3751667	rs3809675	0.36	RP11-161M6.2	clu_16093-1029758-1031145	0.57 (0.13)	2.44e-05	1.14 (0.08)	1.56e-27	0.98 (0.07)	3.96e-42	3.6e-39
16p13.3	rs3751667	rs3751670	0.37	RP11-161M6.2	clu_16093-1029758-1031145	0.57 (0.13)	2.32e-05	1.14 (0.08)	1.56e-27	0.98 (0.07)	4.68e-42	3.6e-39
16p13.3	rs3751667	rs8062800	0.44	RP11-161M6.2	clu_16093-1029110-1029601	-0.55 (0.1)	6.6e-08	-0.95 (0.1)	1.18e-17	-0.76 (0.07)	1.74e-26	1.64e-24
16p13.3	rs3751667	rs4984617	0.44	RP11-161M6.2	clu_16093-1029110-1029601	-0.55 (0.1)	5.25e-08	-0.92 (0.09)	1.92e-17	-0.75 (0.07)	3.12e-26	2.8e-24
16p13.3	rs3751667	rs4984621	0.44	RP11-161M6.2	clu_16093-1029110-1029601	-0.55 (0.1)	5.25e-08	-0.92 (0.09)	1.92e-17	-0.75 (0.07)	3.12e-26	2.8e-24
16p13.3	rs3751667	rs4984618	0.44	RP11-161M6.2	clu_16093-1029110-1029601	-0.55 (0.1)	5.54e-08	-0.92 (0.09)	1.92e-17	-0.75 (0.07)	3.39e-26	2.96e-24
16p13.3	rs3751667	rs12598405	0.41	RP11-161M6.2	clu_16093-1029110-1029601	-0.54 (0.1)	8.37e-08	-0.94 (0.09)	1.38e-17	-0.75 (0.07)	3.84e-26	3.28e-24
16p13.3	rs3751667	rs11859028	0.31	RP11-161M6.2	clu_16093-1029110-1031145	0.44 (0.07)	6.3e-09	0.76 (0.08)	2.33e-16	0.58 (0.05)	2.67e-25	1.47e-23
16p13.3	rs3751667	rs11248958	0.3	RP11-161M6.2	clu_16093-1029110-1031145	0.44 (0.07)	1.78e-10	0.77 (0.09)	2.57e-15	0.56 (0.05)	3.34e-25	1.69e-23
16p13.3	rs3751667	rs8062800	0.44	RP11-161M6.2	clu_16093-1029110-1031145	0.43 (0.07)	2.51e-10	0.84 (0.09)	8.38e-16	0.57 (0.05)	4.33e-25	1.96e-23
16p13.3	rs3751667	rs4984617	0.44	RP11-161M6.2	clu_16093-1029110-1031145	0.43 (0.07)	3.06e-10	0.81 (0.09)	9.39e-16	0.56 (0.05)	5.48e-25	2.27e-23
16p13.3	rs3751667	rs4984621	0.44	RP11-161M6.2	clu_16093-1029110-1031145	0.43 (0.07)	3.13e-10	0.81 (0.09)	9.39e-16	0.56 (0.05)	5.65e-25	2.29e-23
16p13.3	rs3751667	rs11248958	0.3	RP11-161M6.2	clu_16093-1030705-1031145	-0.16 (0.07)	0.0218	-0.47 (0.06)	3.01e-13	-0.34 (0.04)	1.21e-12	1.53e-11
16p13.3	rs3751667	rs2729596	0.29	RP11-161M6.2	clu_16093-1030705-1031145	-0.16 (0.07)	0.0189	-0.47 (0.06)	8.8e-13	-0.34 (0.04)	3.15e-12	3.78e-11
16p13.3	rs3751667	rs3803699	0.29	RP11-161M6.2	clu_16093-1030705-1031145	-0.16 (0.07)	0.0227	-0.47 (0.06)	8.8e-13	-0.33 (0.04)	4.4e-12	5.12e-11
16p13.3	rs3751667	rs1978480	0.29	RP11-161M6.2	clu_16093-1030705-1031145	-0.16 (0.07)	0.0239	-0.47 (0.06)	8.8e-13	-0.33 (0.04)	4.83e-12	5.57e-11
16p13.3	rs3751667	rs7189632	0.32	RP11-161M6.2	clu_16093-1030705-1031145	-0.18 (0.07)	0.00948	-0.47 (0.06)	3.14e-12	-0.34 (0.05)	5.59e-12	6.42e-11
16p13.3	rs3751667	rs34316274	0.75	RP11-161M6.2	clu_16093-1030705-1031145	-0.12 (0.08)	0.11698	-0.44 (0.07)	3.36166e-09	-0.3 (0.05)	4.21474e-07	2.42789e-06
16p13.3	rs3751667	rs4984738	0.5	RP11-161M6.2	clu_16093-1029110-1030127	-0.19 (0.07)	0.00972	-0.34 (0.07)	1.03e-05	-0.27 (0.05)	1.14e-05	5.35e-05
16p13.3	rs3751667	rs4984980	0.22	RP11-161M6.2	clu_16093-1029110-1030127	-0.23 (0.08)	0.00684	-0.32 (0.08)	0.000235	-0.28 (0.06)	0.000122	0.000527
16p13.3	rs3751667	rs7187750	0.36	RP11-161M6.2	clu_16093-1029110-1030127	-0.2 (0.09)	0.0237	-0.4 (0.09)	3.65e-05	-0.3 (0.06)	0.000125	0.000538
16p13.3	rs3751667	rs12596045	0.24	RP11-161M6.2	clu_16093-1029110-1030127	-0.23 (0.09)	0.00864	-0.35 (0.09)	0.000164	-0.29 (0.06)	0.000129	0.000555
16p13.3	rs3751667	rs4984741	0.8	RP11-161M6.2	clu_16093-1029110-1030127	-0.2 (0.08)	0.00779	-0.32 (0.08)	0.000179	-0.26 (0.06)	0.000136	0.000583
16p13.3	rs3751667	rs7500087	0.23	RP11-161M6.2	clu_16093-1030457-1031145	-0.09 (0.08)	0.236	-0.29 (0.06)	7.11e-06	-0.21 (0.05)	0.00034	0.00139
16p13.3	rs3751667	rs12596045	0.24	RP11-161M6.2	clu_16093-1030457-1031145	-0.11 (0.08)	0.171	-0.28 (0.07)	8.13e-05	-0.2 (0.05)	0.00192	0.00656
16p13.3	rs3751667	rs929069	0.24	RP11-161M6.2	clu_16093-1030457-1031145	-0.11 (0.08)	0.171	-0.27 (0.07)	0.00011	-0.2 (0.05)	0.00244	0.00821
16p13.3	rs3751667	rs12925888	0.24	RP11-161M6.2	clu_16093-1030457-1031145	-0.11 (0.08)	0.171	-0.27 (0.07)	0.00011	-0.2 (0.05)	0.00244	0.00821
16p13.3	rs3751667	rs4984986	0.24	RP11-161M6.2	clu_16093-1030457-1031145	-0.11 (0.08)	0.171	-0.27 (0.07)	0.00011	-0.2 (0.05)	0.00244	0.00821
16p13.3	rs3751667	rs11248958	0.3	RP11-161M6.2	clu_16093-1029273-1029601	-0.13 (0.08)	0.0945	-0.26 (0.07)	0.000385	-0.2 (0.05)	0.00347	0.0114
16p13.3	rs3751667	rs2432296	0.34	RP11-161M6.2	clu_16093-1029273-1029601	-0.12 (0.08)	0.145	-0.27 (0.07)	0.000264	-0.2 (0.05)	0.00448	0.0147
16p13.3	rs3751667	rs2858991	0.34	RP11-161M6.2	clu_16093-1029273-1029601	-0.11 (0.08)	0.154	-0.27 (0.07)	0.000264	-0.2 (0.05)	0.00478	0.0156
16p13.3	rs3751667	rs4984622	0.39	RP11-161M6.2	clu_16093-1029273-1029601	-0.2 (0.1)	0.0471	-0.31 (0.1)	0.00145	-0.26 (0.07)	0.00489	0.016
16p13.3	rs3751667	rs6600238	0.37	RP11-161M6.2	clu_16093-1029273-1029601	-0.21 (0.1)	0.0398	-0.3 (0.1)	0.00233	-0.26 (0.07)	0.00618	0.02
16p13.3	rs3751667	rs11542179	0.35	RP11-161M6.2	clu_16094-1025995-1026778	0.64 (0.11)	4.45e-08	0.84 (0.08)	1.1e-20	0.78 (0.06)	2.12e-33	3.63e-30
16p13.3	rs3751667	rs8046554	0.38	RP11-161M6.2	clu_16094-1025995-1026778	0.59 (0.1)	4e-08	0.84 (0.08)	1.1e-20	0.75 (0.06)	4.61e-33	3.63e-30
16p13.3	rs3751667	rs3809675	0.36	RP11-161M6.2	clu_16094-1025995-1026778	0.64 (0.11)	2.88e-08	0.83 (0.08)	2.7e-20	0.77 (0.06)	5.81e-33	3.63e-30
16p13.3	rs3751667	rs3826237	0.35	RP11-161M6.2	clu_16094-1025995-1026778	0.63 (0.11)	2.63e-08	0.83 (0.08)	2.7e-20	0.76 (0.06)	6.05e-33	3.63e-30
16p13.3	rs3751667	rs12932842	0.37	RP11-161M6.2	clu_16094-1025995-1026778	0.63 (0.11)	3.52e-08	0.83 (0.08)	2.7e-20	0.77 (0.06)	7.42e-33	3.63e-30
16p13.3	rs3751667	rs2432296	0.34	RP11-161M6.2	clu_16094-1025995-1026327	0.5 (0.09)	5.21e-08	0.75 (0.08)	1.68e-16	0.63 (0.06)	1.95e-25	9.46e-24
16p13.3	rs3751667	rs2858991	0.34	RP11-161M6.2	clu_16094-1025995-1026327	0.5 (0.09)	5.82e-08	0.75 (0.08)	1.68e-16	0.63 (0.06)	2.19e-25	1.04e-23
16p13.3	rs3751667	rs7189632	0.32	RP11-161M6.2	clu_16094-1025995-1026327	0.48 (0.09)	7.19e-08	0.75 (0.08)	4.81e-16	0.62 (0.06)	2.2e-24	1.03e-22
16p13.3	rs3751667	rs113455135	0.32	RP11-161M6.2	clu_16094-1025995-1026327	0.48 (0.09)	7.75e-08	0.75 (0.08)	4.81e-16	0.62 (0.06)	2.38e-24	1.09e-22
16p13.3	rs3751667	rs9931183	0.32	RP11-161M6.2	clu_16094-1025995-1026327	0.47 (0.09)	1.03e-07	0.75 (0.08)	4.81e-16	0.62 (0.06)	3.74e-24	1.63e-22
16p13.3	rs3751667	rs2187840	0.33	RP11-161M6.2	clu_16094-1026071-1026778	0.57 (0.12)	6.48e-06	0.54 (0.07)	7.59e-13	0.54 (0.06)	1.19e-18	2.55e-17
16p13.3	rs3751667	rs1978482	0.33	RP11-161M6.2	clu_16094-1026071-1026778	0.57 (0.12)	6.48e-06	0.54 (0.07)	7.59e-13	0.54 (0.06)	1.19e-18	2.55e-17
16p13.3	rs3751667	rs1978481	0.34	RP11-161M6.2	clu_16094-1026071-1026778	0.56 (0.12)	8.7e-06	0.54 (0.07)	7.59e-13	0.54 (0.06)	1.61e-18	3.41e-17
16p13.3	rs3751667	rs67055721	0.31	RP11-161M6.2	clu_16094-1026071-1026778	0.54 (0.13)	2.56e-05	0.55 (0.07)	4.36e-13	0.55 (0.06)	2.47e-18	4.91e-17
16p13.3	rs3751667	rs11542179	0.35	RP11-161M6.2	clu_16094-1026071-1026778	0.66 (0.13)	1.8e-06	0.52 (0.07)	2.01e-11	0.55 (0.06)	6.17e-17	7.58e-16
16p13.3	rs3751667	rs34316274	0.75	RP11-161M6.2	clu_16094-1026071-1026778	0.46 (0.11)	3.6063e-05	0.25 (0.07)	0.00031473	0.31 (0.06)	1.86901e-06	6.67431e-06
16p13.3	rs3751667	rs113455135	0.32	RP11-161M6.2	clu_16094-1026400-1026778	-0.34 (0.11)	0.00133	-0.66 (0.09)	5.8e-12	-0.53 (0.07)	7.06e-14	5.63e-13
16p13.3	rs3751667	rs3803700	0.32	RP11-161M6.2	clu_16094-1026400-1026778	-0.34 (0.1)	0.00133	-0.66 (0.09)	5.8e-12	-0.53 (0.07)	7.11e-14	5.65e-13
16p13.3	rs3751667	rs9931183	0.32	RP11-161M6.2	clu_16094-1026400-1026778	-0.34 (0.1)	0.00148	-0.66 (0.09)	5.8e-12	-0.53 (0.07)	8.61e-14	6.7e-13
16p13.3	rs3751667	rs11248960	0.32	RP11-161M6.2	clu_16094-1026400-1026778	-0.34 (0.1)	0.00148	-0.66 (0.09)	5.8e-12	-0.53 (0.07)	8.61e-14	6.7e-13
16p13.3	rs3751667	rs11248961	0.32	RP11-161M6.2	clu_16094-1026400-1026778	-0.34 (0.1)	0.00148	-0.66 (0.09)	5.8e-12	-0.53 (0.07)	8.61e-14	6.7e-13
16p13.3	rs3751667	rs8045859	0.38	RP11-161M6.2	clu_16094-1026555-1026778	0.54 (0.12)	7.93e-06	0.34 (0.06)	8.72e-08	0.38 (0.05)	2.95e-11	1.9e-10
16p13.3	rs3751667	rs2187840	0.33	RP11-161M6.2	clu_16094-1026555-1026778	0.56 (0.12)	3.45e-06	0.3 (0.05)	1.3e-07	0.34 (0.05)	5.2e-11	3.31e-10
16p13.3	rs3751667	rs1978482	0.33	RP11-161M6.2	clu_16094-1026555-1026778	0.56 (0.12)	3.45e-06	0.3 (0.05)	1.3e-07	0.34 (0.05)	5.2e-11	3.31e-10
16p13.3	rs3751667	rs1978481	0.34	RP11-161M6.2	clu_16094-1026555-1026778	0.55 (0.12)	4.65e-06	0.3 (0.05)	1.3e-07	0.34 (0.05)	6.33e-11	4.02e-10
16p13.3	rs3751667	rs3826237	0.35	RP11-161M6.2	clu_16094-1026555-1026778	0.62 (0.12)	1.11e-06	0.29 (0.05)	3.68e-07	0.35 (0.05)	1.27e-10	8e-10
16p13.3	rs3751667	rs2432296	0.34	RP11-161M6.2	clu_16094-1026395-1026778	0.28 (0.09)	0.0023	-0.54 (0.06)	1.4e-16	-0.32 (0.05)	4.37e-10	2.64e-09
16p13.3	rs3751667	rs2858991	0.34	RP11-161M6.2	clu_16094-1026395-1026778	0.29 (0.09)	0.00206	-0.54 (0.06)	1.4e-16	-0.32 (0.05)	4.62e-10	2.75e-09
16p13.3	rs3751667	rs11248958	0.3	RP11-161M6.2	clu_16094-1026395-1026778	0.29 (0.09)	0.00171	-0.53 (0.05)	2.75e-16	-0.31 (0.05)	1.31e-09	7.06e-09
16p13.3	rs3751667	rs1978480	0.29	RP11-161M6.2	clu_16094-1026395-1026778	0.28 (0.09)	0.00217	-0.53 (0.06)	5.89e-16	-0.31 (0.05)	3.62e-09	1.87e-08
16p13.3	rs3751667	rs2729596	0.29	RP11-161M6.2	clu_16094-1026395-1026778	0.28 (0.09)	0.00207	-0.53 (0.06)	5.89e-16	-0.3 (0.05)	3.86e-09	1.99e-08
16p13.3	rs3751667	rs2187840	0.33	RP11-161M6.2	clu_16094-1026559-1026778	0.3 (0.11)	0.00511	0.34 (0.06)	8.62e-07	0.33 (0.05)	9.05e-08	3.78e-07
16p13.3	rs3751667	rs1978482	0.33	RP11-161M6.2	clu_16094-1026559-1026778	0.3 (0.11)	0.00511	0.34 (0.06)	8.62e-07	0.33 (0.05)	9.05e-08	3.78e-07
16p13.3	rs3751667	rs1978481	0.34	RP11-161M6.2	clu_16094-1026559-1026778	0.29 (0.1)	0.0058	0.34 (0.06)	8.62e-07	0.32 (0.05)	1.03e-07	4.26e-07
16p13.3	rs3751667	rs67055721	0.31	RP11-161M6.2	clu_16094-1026559-1026778	0.28 (0.11)	0.00881	0.34 (0.07)	7.14e-07	0.33 (0.06)	1.33e-07	5.47e-07
16p13.3	rs3751667	rs4984739	0.36	RP11-161M6.2	clu_16094-1026559-1026778	0.28 (0.11)	0.0104	0.36 (0.07)	1.32e-06	0.33 (0.06)	3.57e-07	1.43e-06
16p13.3	rs3751667	rs4984741	0.8	RP11-161M6.2	clu_16094-1026559-1026778	0.32 (0.09)	0.000306498	0.21 (0.06)	0.000517848	0.24 (0.05)	1.26e-05	4.1e-05
16p13.3	rs3751667	rs79541642	0.35	RP11-161M6.2	clu_16094-1026400-1026527	0.6 (0.13)	1.11e-05	0.25 (0.07)	0.000253	0.32 (0.06)	1.91e-06	6.8e-06
16p13.3	rs3751667	rs8045859	0.38	RP11-161M6.2	clu_16094-1026400-1026527	0.51 (0.13)	6.81e-05	0.27 (0.07)	0.00024	0.33 (0.06)	3.13e-06	1.1e-05
16p13.3	rs3751667	rs11542180	0.76	RP11-161M6.2	clu_16094-1026400-1026527	0.52 (0.11)	4.55e-06	0.19 (0.05)	0.000666	0.26 (0.05)	4.38e-06	1.51e-05
16p13.3	rs3751667	rs3826237	0.35	RP11-161M6.2	clu_16094-1026400-1026527	0.58 (0.13)	1.15e-05	0.23 (0.06)	0.000517	0.29 (0.06)	5.7e-06	1.95e-05
16p13.3	rs3751667	rs12932842	0.37	RP11-161M6.2	clu_16094-1026400-1026527	0.6 (0.13)	1.03e-05	0.23 (0.06)	0.000517	0.3 (0.06)	5.98e-06	2.04e-05
16p13.3	rs3751667	rs8045859	0.38	RP11-161M6.2	clu_16094-1026071-1026327	0.55 (0.13)	2.56e-05	0.14 (0.07)	0.0621	0.24 (0.06)	0.00286	0.0062
16p13.3	rs3751667	rs3826237	0.35	RP11-161M6.2	clu_16094-1026071-1026327	0.63 (0.13)	3.62e-06	0.1 (0.07)	0.116	0.21 (0.06)	0.00693	0.0146
16p13.3	rs3751667	rs12932842	0.37	RP11-161M6.2	clu_16094-1026071-1026327	0.65 (0.13)	2.98e-06	0.1 (0.07)	0.116	0.21 (0.06)	0.00717	0.0151
16p13.3	rs3751667	rs3751670	0.37	RP11-161M6.2	clu_16094-1026071-1026327	0.63 (0.13)	3.86e-06	0.1 (0.07)	0.116	0.21 (0.06)	0.00738	0.0155
16p13.3	rs3751667	rs79541642	0.35	RP11-161M6.2	clu_16094-1026071-1026327	0.64 (0.13)	3.49e-06	0.1 (0.07)	0.134	0.21 (0.06)	0.00763	0.016
16q12.1	rs10852606	rs12932038	1	HEATR3	clu_17583-50100180-50100278	-0.45 (0.1)	1.09e-05	-0.29 (0.07)	2.48e-05	-0.34 (0.06)	8.69e-09	4.57e-06
16q12.1	rs10852606	rs4442804	1	HEATR3	clu_17583-50100180-50100278	-0.44 (0.1)	1.86e-05	-0.29 (0.07)	2.48e-05	-0.34 (0.06)	1.33e-08	4.57e-06
16q12.1	rs10852606	rs2041920	0.92	HEATR3	clu_17583-50100180-50100278	-0.47 (0.1)	7.57e-06	-0.27 (0.07)	8.75e-05	-0.33 (0.06)	3.79e-08	4.57e-06
16q12.1	rs10852606	rs6416785	0.98	HEATR3	clu_17583-50100180-50100278	-0.46 (0.1)	1.46e-05	-0.27 (0.07)	6.01e-05	-0.33 (0.06)	4.06e-08	4.57e-06
16q12.1	rs10852606	rs7186889	0.99	HEATR3	clu_17583-50100180-50100278	-0.47 (0.1)	5.47e-06	-0.26 (0.07)	0.000161	-0.32 (0.06)	6.54e-08	4.57e-06
16q12.1	rs10852606	rs77791228	0.28	HEATR3	clu_17583-50100450-50102691	-0.23 (0.13)	0.0707	-0.33 (0.1)	0.001	-0.3 (0.08)	0.00113	0.0102
16q12.1	rs10852606	rs2080506	0.27	HEATR3	clu_17583-50100450-50102691	-0.21 (0.13)	0.111	-0.33 (0.1)	0.00104	-0.29 (0.08)	0.00188	0.0163
16q12.1	rs10852606	rs2010075	0.26	HEATR3	clu_17583-50100180-50102691	-0.22 (0.09)	0.0169	-0.17 (0.07)	0.0204	-0.19 (0.06)	0.00598	0.0404
16q12.1	rs10852606	rs2356743	0.26	HEATR3	clu_17583-50100180-50102691	-0.22 (0.09)	0.0169	-0.17 (0.07)	0.0213	-0.19 (0.06)	0.00623	0.0418
16q12.1	rs10852606	rs9926402	0.53	HEATR3	clu_17583-50100180-50102691	-0.33 (0.1)	0.000771	-0.11 (0.08)	0.134	-0.19 (0.06)	0.00722	0.0458
16q12.1	rs10852606	rs13332394	0.53	HEATR3	clu_17583-50100180-50102691	-0.33 (0.1)	0.000797	-0.11 (0.08)	0.134	-0.19 (0.06)	0.00741	0.0467
16q12.1	rs10852606	rs2287197	0.99	HEATR3	clu_17584-50102778-50109482	-0.27 (0.08)	0.000421	-0.35 (0.04)	1.15e-14	-0.33 (0.03)	1.09e-20	1.92e-18
16q12.1	rs10852606	rs2005402	1	HEATR3	clu_17584-50102778-50109482	-0.27 (0.08)	0.000478	-0.35 (0.04)	1.03e-14	-0.33 (0.03)	1.09e-20	1.92e-18
16q12.1	rs10852606	rs59059423	1	HEATR3	clu_17584-50102778-50109482	-0.28 (0.08)	0.00032	-0.34 (0.04)	1.73e-14	-0.33 (0.03)	1.71e-20	1.92e-18
16q12.1	rs10852606	rs8046856	0.98	HEATR3	clu_17584-50102778-50109482	-0.27 (0.08)	0.000362	-0.34 (0.04)	1.73e-14	-0.33 (0.03)	2e-20	1.92e-18
16q12.1	rs10852606	rs6500282	1	HEATR3	clu_17584-50102778-50109482	-0.27 (0.08)	0.000485	-0.34 (0.04)	1.48e-14	-0.33 (0.03)	2.07e-20	1.92e-18
16q12.1	rs10852606	rs2287197	0.99	HEATR3	clu_17584-50102778-50103156	-0.12 (0.09)	0.165	-0.33 (0.04)	2.02e-13	-0.3 (0.04)	1.35e-15	5.16e-14
16q12.1	rs10852606	rs2356835	1	HEATR3	clu_17584-50102778-50103156	-0.13 (0.09)	0.141	-0.33 (0.04)	4.28e-13	-0.29 (0.04)	3.73e-15	1.32e-13
16q12.1	rs10852606	rs2356836	0.99	HEATR3	clu_17584-50102778-50103156	-0.13 (0.09)	0.143	-0.33 (0.04)	4.28e-13	-0.29 (0.04)	3.82e-15	1.33e-13
16q12.1	rs10852606	rs2160571	0.99	HEATR3	clu_17584-50102778-50103156	-0.12 (0.09)	0.15	-0.33 (0.04)	4.28e-13	-0.29 (0.04)	4.32e-15	1.48e-13
16q12.1	rs10852606	rs7498242	0.98	HEATR3	clu_17584-50102778-50103156	-0.12 (0.09)	0.157	-0.33 (0.04)	4.28e-13	-0.29 (0.04)	4.53e-15	1.48e-13
16q12.1	rs10852606	rs2287197	0.99	HEATR3	clu_17584-50103200-50104089	-0.11 (0.08)	0.16	-0.32 (0.04)	4.37e-12	-0.28 (0.03)	1.15e-13	2.23e-12
16q12.1	rs10852606	rs2160571	0.99	HEATR3	clu_17584-50103200-50104089	-0.12 (0.08)	0.144	-0.31 (0.04)	6.46e-12	-0.27 (0.04)	1.91e-13	3.67e-12
16q12.1	rs10852606	rs11642695	0.99	HEATR3	clu_17584-50103200-50104089	-0.11 (0.08)	0.154	-0.31 (0.04)	6.46e-12	-0.27 (0.04)	2.1e-13	3.97e-12
16q12.1	rs10852606	rs8052492	0.99	HEATR3	clu_17584-50103200-50104089	0.11 (0.08)	0.153	0.31 (0.04)	6.46e-12	0.27 (0.04)	2.12e-13	3.97e-12
16q12.1	rs10852606	rs8046856	0.98	HEATR3	clu_17584-50103200-50104089	-0.11 (0.08)	0.155	-0.31 (0.04)	6.46e-12	-0.27 (0.04)	2.12e-13	3.97e-12
16q12.1	rs10852606	rs8046344	1	HEATR3	clu_17584-50102778-50104055	-0.14 (0.05)	0.00988	-0.27 (0.05)	1.95e-07	-0.21 (0.04)	1.17e-07	8.63e-07
16q12.1	rs10852606	rs2005402	1	HEATR3	clu_17584-50102778-50104055	-0.13 (0.05)	0.0146	-0.28 (0.05)	1.08e-07	-0.21 (0.04)	1.25e-07	9.16e-07
16q12.1	rs10852606	rs59059423	1	HEATR3	clu_17584-50102778-50104055	-0.13 (0.05)	0.0114	-0.27 (0.05)	1.85e-07	-0.21 (0.04)	1.38e-07	1.01e-06
16q12.1	rs10852606	rs2160571	0.99	HEATR3	clu_17584-50102778-50104055	-0.13 (0.05)	0.0127	-0.27 (0.05)	1.85e-07	-0.21 (0.04)	1.68e-07	1.19e-06
16q12.1	rs10852606	rs7498242	0.98	HEATR3	clu_17584-50102778-50104055	-0.13 (0.05)	0.0132	-0.27 (0.05)	1.85e-07	-0.21 (0.04)	1.73e-07	1.21e-06
16q12.1	rs10852606	rs12934889	0.5	HEATR3	clu_17584-50104201-50109482	-0.2 (0.13)	0.115	-0.21 (0.07)	0.00331	-0.21 (0.06)	0.00967	0.0403
16q12.1	rs10852606	rs2058815	0.92	HEATR3	clu_17585-50109622-50109966	-0.04 (0.08)	0.617	-0.23 (0.04)	2.33e-08	-0.19 (0.04)	1.23e-06	0.000164
16q12.1	rs10852606	rs4619403	0.92	HEATR3	clu_17585-50109622-50109966	-0.03 (0.08)	0.694	-0.23 (0.04)	2.33e-08	-0.19 (0.04)	1.78e-06	0.000164
16q12.1	rs10852606	rs8049154	0.92	HEATR3	clu_17585-50109622-50109966	-0.03 (0.08)	0.694	-0.23 (0.04)	2.33e-08	-0.19 (0.04)	1.78e-06	0.000164
16q12.1	rs10852606	rs12922541	0.92	HEATR3	clu_17585-50109622-50109966	-0.03 (0.08)	0.694	-0.23 (0.04)	2.33e-08	-0.19 (0.04)	1.78e-06	0.000164
16q12.1	rs10852606	rs1362633	0.92	HEATR3	clu_17585-50109622-50109966	-0.03 (0.08)	0.714	-0.23 (0.04)	2.33e-08	-0.19 (0.04)	1.85e-06	0.000164
16q12.1	rs10852606	rs2058815	0.92	HEATR3	clu_17585-50110000-50112652	-0.02 (0.08)	0.805	-0.21 (0.04)	2.97e-07	-0.17 (0.04)	1.96e-05	0.000264
16q12.1	rs10852606	rs4619403	0.92	HEATR3	clu_17585-50110000-50112652	-0.01 (0.07)	0.916	-0.21 (0.04)	2.97e-07	-0.16 (0.04)	2.98e-05	0.000358
16q12.1	rs10852606	rs8049154	0.92	HEATR3	clu_17585-50110000-50112652	-0.01 (0.07)	0.916	-0.21 (0.04)	2.97e-07	-0.16 (0.04)	2.98e-05	0.000358
16q12.1	rs10852606	rs12922541	0.92	HEATR3	clu_17585-50110000-50112652	-0.01 (0.07)	0.916	-0.21 (0.04)	2.97e-07	-0.16 (0.04)	2.98e-05	0.000358
16q12.1	rs10852606	rs1362633	0.92	HEATR3	clu_17585-50110000-50112652	-0.01 (0.07)	0.945	-0.21 (0.04)	2.97e-07	-0.16 (0.04)	3.15e-05	0.000373
16q12.1	rs10852606	rs2287197	0.99	HEATR3	clu_17586-50120262-50134141	-0.05 (0.08)	0.547	-0.16 (0.04)	2.55e-05	-0.14 (0.03)	9.85e-05	0.00717
16q12.1	rs10852606	rs2005402	1	HEATR3	clu_17586-50120262-50134141	-0.05 (0.08)	0.558	-0.17 (0.04)	4.53e-05	-0.15 (0.04)	0.000248	0.00717
16q12.1	rs10852606	rs59059423	1	HEATR3	clu_17586-50120262-50134141	-0.06 (0.08)	0.465	-0.17 (0.04)	6.43e-05	-0.15 (0.04)	0.000263	0.00717
16q12.1	rs10852606	rs8046344	1	HEATR3	clu_17586-50120262-50134141	-0.06 (0.08)	0.502	-0.17 (0.04)	6.39e-05	-0.15 (0.04)	0.000288	0.00717
16q12.1	rs10852606	rs55646814	1	HEATR3	clu_17586-50120262-50134141	-0.06 (0.08)	0.503	-0.17 (0.04)	6.43e-05	-0.15 (0.04)	0.000296	0.00717
20q13.33	rs2297440	rs6090457	0.25	KCNQ2	clu_30286-62078190-62103521	-0.23 (0.12)	0.0661	-0.25 (0.09)	0.0053	-0.24 (0.07)	0.00251	0.0198
20q13.33	rs2297440	rs6089923	0.25	KCNQ2	clu_30286-62078190-62103521	-0.23 (0.12)	0.0675	-0.25 (0.09)	0.0053	-0.24 (0.07)	0.00255	0.0198
20q13.33	rs2297440	rs3827022	0.24	KCNQ2	clu_30286-62078190-62103521	-0.22 (0.13)	0.0826	-0.25 (0.09)	0.0053	-0.24 (0.07)	0.00305	0.0198
20q13.33	rs2297440	rs3827023	0.24	KCNQ2	clu_30286-62078190-62103521	-0.22 (0.13)	0.0826	-0.25 (0.09)	0.0053	-0.24 (0.07)	0.00305	0.0198
20q13.33	rs2297440	rs3810486	0.23	KCNQ2	clu_30286-62078190-62103521	-0.23 (0.13)	0.0707	-0.24 (0.09)	0.00787	-0.24 (0.07)	0.00388	0.0202
20q13.33	rs2297440	rs6122154	0.75	LIME1	clu_30312-62368064-62368886	0.06 (0.12)	0.628	0.41 (0.07)	1.82e-07	0.32 (0.06)	2.04e-06	0.000152
20q13.33	rs2297440	rs2253823	0.73	LIME1	clu_30312-62368064-62368886	0.05 (0.12)	0.68	0.37 (0.07)	3.21e-07	0.3 (0.06)	2.71e-06	0.000152
20q13.33	rs2297440	rs2253829	0.73	LIME1	clu_30312-62368064-62368886	0.05 (0.12)	0.68	0.37 (0.07)	3.21e-07	0.3 (0.06)	2.71e-06	0.000152
20q13.33	rs2297440	rs3787092	0.98	LIME1	clu_30312-62368064-62368886	-0.06 (0.12)	0.593	-0.38 (0.07)	3.33e-07	-0.3 (0.06)	3.06e-06	0.000152
20q13.33	rs2297440	rs3787091	0.98	LIME1	clu_30312-62368064-62368886	-0.06 (0.12)	0.593	-0.38 (0.07)	3.33e-07	-0.3 (0.06)	3.06e-06	0.000152
20q13.33	rs2297440	rs6122154	0.75	LIME1	clu_30312-62367538-62368886	0.02 (0.1)	0.843	-0.34 (0.07)	1.63e-06	-0.23 (0.06)	0.000141	0.00094
20q13.33	rs2297440	rs67468102	0.75	LIME1	clu_30312-62367538-62368886	0.05 (0.1)	0.64	-0.34 (0.07)	1.68e-06	-0.22 (0.06)	0.000291	0.00175
20q13.33	rs2297440	rs397783825	0.98	LIME1	clu_30312-62367538-62368886	0 (0.1)	0.976	0.31 (0.07)	7.42e-06	0.21 (0.05)	0.000394	0.00222
20q13.33	rs2297440	rs3787092	0.98	LIME1	clu_30312-62367538-62368886	-0.01 (0.1)	0.935	0.31 (0.07)	7.42e-06	0.21 (0.06)	0.000418	0.00224
20q13.33	rs2297440	rs3787091	0.98	LIME1	clu_30312-62367538-62368886	-0.01 (0.1)	0.935	0.31 (0.07)	7.42e-06	0.21 (0.06)	0.000418	0.00224
20q13.33	rs2297440	rs4809328	0.47	LIME1	clu_30394-62369255-62369361	0.15 (0.11)	0.16	0.46 (0.08)	3.86e-08	0.35 (0.06)	2.35e-07	4.99e-05
20q13.33	rs2297440	rs6062498	0.49	LIME1	clu_30394-62369255-62369361	0.15 (0.1)	0.147	0.44 (0.08)	6.29e-08	0.34 (0.06)	3.3e-07	4.99e-05
20q13.33	rs2297440	rs3761123	0.45	LIME1	clu_30394-62369255-62369361	0.17 (0.11)	0.11	0.43 (0.08)	1.17e-07	0.34 (0.06)	3.46e-07	4.99e-05
20q13.33	rs2297440	rs55946717	0.46	LIME1	clu_30394-62369255-62369361	0.17 (0.11)	0.11	0.43 (0.08)	1.17e-07	0.34 (0.06)	3.48e-07	4.99e-05
20q13.33	rs2297440	rs4809327	0.46	LIME1	clu_30394-62369255-62369361	0.17 (0.11)	0.11	0.43 (0.08)	1.17e-07	0.34 (0.06)	3.53e-07	4.99e-05
20q13.33	rs2297440	rs150938918	0.42	LIME1	clu_30394-62369255-62369536	-0.19 (0.07)	0.00866	-0.17 (0.04)	6.82e-05	-0.17 (0.04)	1.06e-05	0.000598
20q13.33	rs2297440	rs6011058	0.46	LIME1	clu_30394-62369255-62369536	-0.2 (0.07)	0.00564	-0.15 (0.04)	0.000269	-0.16 (0.03)	3.95e-05	0.00141
20q13.33	rs2297440	rs6062509	0.47	LIME1	clu_30394-62369255-62369536	-0.21 (0.07)	0.0043	-0.14 (0.04)	0.000417	-0.16 (0.03)	5.38e-05	0.00146
20q13.33	rs2297440	rs4809221	0.46	LIME1	clu_30394-62369255-62369536	-0.22 (0.07)	0.00238	-0.13 (0.04)	0.000858	-0.15 (0.03)	8.65e-05	0.00192
20q13.33	rs2297440	rs6062510	0.46	LIME1	clu_30394-62369255-62369536	-0.22 (0.07)	0.00302	-0.13 (0.04)	0.000858	-0.15 (0.03)	0.000101	0.00221
20q13.33	rs2297440	rs6122154	0.75	LIME1	clu_30394-62369255-62369326	0.04 (0.12)	0.72	0.34 (0.07)	1.11e-05	0.26 (0.06)	0.000392	0.00554
20q13.33	rs2297440	rs1056441	0.46	LIME1	clu_30394-62369255-62369326	-0.07 (0.11)	0.524	-0.3 (0.07)	3.25e-05	-0.23 (0.06)	0.00062	0.00728
20q13.33	rs2297440	rs139615886	0.75	LIME1	clu_30394-62369255-62369326	0.07 (0.13)	0.585	0.29 (0.07)	7.96e-05	0.24 (0.06)	0.000991	0.0108
20q13.33	rs2297440	rs6062304	0.46	LIME1	clu_30394-62369255-62369326	-0.09 (0.11)	0.394	-0.28 (0.07)	0.00012	-0.22 (0.06)	0.00136	0.014
20q13.33	rs2297440	rs1291213	0.73	LIME1	clu_30394-62369255-62369326	0.05 (0.12)	0.663	0.3 (0.07)	6.11e-05	0.23 (0.06)	0.0014	0.0143
20q13.33	rs2297440	rs2150910	0.25	RTEL1-TNFRSF6B	clu_30376-62294908-62297357	-0.34 (0.15)	0.0263	-0.35 (0.07)	6.61e-06	-0.35 (0.07)	1.18e-06	0.000794
20q13.33	rs2297440	rs45602035	0.11	RTEL1-TNFRSF6B	clu_30376-62294908-62297357	0.31 (0.26)	0.241	0.63 (0.12)	2.04e-06	0.57 (0.11)	2.19e-06	0.000794
20q13.33	rs2297440	rs77993536	0.24	RTEL1-TNFRSF6B	clu_30376-62294908-62297357	0.32 (0.18)	0.071	0.39 (0.08)	6.47e-06	0.38 (0.07)	2.8e-06	0.000794
20q13.33	rs2297440	rs199657529	0.22	RTEL1-TNFRSF6B	clu_30376-62294908-62297357	0.37 (0.17)	0.0309	0.38 (0.08)	1.34e-05	0.38 (0.07)	3.02e-06	0.000794
20q13.33	rs2297440	rs117265989	0.13	RTEL1-TNFRSF6B	clu_30376-62294908-62297357	0.3 (0.27)	0.252	0.59 (0.12)	3.19e-06	0.54 (0.11)	3.65e-06	0.000794
20q13.33	rs2297440	rs6062477	0.38	RTEL1-TNFRSF6B	clu_30376-62294242-62297357	0.19 (0.11)	0.0924	0.27 (0.06)	3.54e-05	0.25 (0.05)	3.46e-05	0.00157
20q13.33	rs2297440	rs6062295	0.38	RTEL1-TNFRSF6B	clu_30376-62294242-62297357	0.19 (0.11)	0.094	0.27 (0.06)	3.54e-05	0.25 (0.05)	3.55e-05	0.00157
20q13.33	rs2297440	rs2297432	0.38	RTEL1-TNFRSF6B	clu_30376-62294242-62297357	0.19 (0.11)	0.0904	0.26 (0.06)	4.47e-05	0.25 (0.05)	4.31e-05	0.00157
20q13.33	rs2297440	rs909333	0.6	RTEL1-TNFRSF6B	clu_30376-62294242-62297357	-0.24 (0.12)	0.0463	-0.27 (0.07)	0.000131	-0.27 (0.06)	6.14e-05	0.00165
20q13.33	rs2297440	rs71325464	0.75	RTEL1-TNFRSF6B	clu_30376-62294242-62297357	-0.18 (0.12)	0.154	-0.3 (0.07)	5.37e-05	-0.27 (0.06)	9.02e-05	0.00165
20q13.33	rs2297440	rs8114049	0.61	RTEL1-TNFRSF6B	clu_30377-62305446-62309567	0.34 (0.09)	0.000146	0.41 (0.05)	2.08e-14	0.39 (0.04)	8.59e-17	1.11e-13
20q13.33	rs2297440	rs41309367	0.61	RTEL1-TNFRSF6B	clu_30377-62305446-62309567	0.34 (0.09)	0.000128	0.4 (0.05)	5.24e-14	0.39 (0.04)	1.92e-16	1.11e-13
20q13.33	rs2297440	rs6062486	0.6	RTEL1-TNFRSF6B	clu_30377-62305446-62309567	0.35 (0.09)	6.12e-05	0.4 (0.05)	1.13e-13	0.38 (0.04)	1.93e-16	1.11e-13
20q13.33	rs2297440	rs6062298	0.6	RTEL1-TNFRSF6B	clu_30377-62305446-62309567	0.35 (0.09)	6.52e-05	0.4 (0.05)	1.13e-13	0.38 (0.04)	2.05e-16	1.11e-13
20q13.33	rs2297440	rs3787089	0.61	RTEL1-TNFRSF6B	clu_30377-62305446-62309567	0.32 (0.09)	0.000402	0.39 (0.05)	7.92e-13	0.37 (0.05)	1.18e-14	5.14e-12
20q13.33	rs2297440	rs8114049	0.61	RTEL1-TNFRSF6B	clu_30377-62305446-62309498	-0.33 (0.11)	0.00316	-0.32 (0.07)	1.96e-06	-0.32 (0.06)	2.76e-07	4.67e-06
20q13.33	rs2297440	rs41309367	0.61	RTEL1-TNFRSF6B	clu_30377-62305446-62309498	-0.33 (0.11)	0.00272	-0.32 (0.07)	2.26e-06	-0.32 (0.06)	2.77e-07	4.67e-06
20q13.33	rs2297440	rs6062486	0.6	RTEL1-TNFRSF6B	clu_30377-62305446-62309498	-0.35 (0.11)	0.00162	-0.31 (0.07)	3.79e-06	-0.32 (0.06)	2.9e-07	4.81e-06
20q13.33	rs2297440	rs6062298	0.6	RTEL1-TNFRSF6B	clu_30377-62305446-62309498	-0.35 (0.11)	0.00171	-0.31 (0.07)	3.79e-06	-0.32 (0.06)	3.05e-07	5.02e-06
20q13.33	rs2297440	rs4083754	0.78	RTEL1-TNFRSF6B	clu_30377-62305446-62309498	-0.35 (0.13)	0.00709	-0.32 (0.07)	1.67e-06	-0.32 (0.06)	5.13e-07	7.74e-06
20q13.33	rs2297440	rs3787089	0.61	RTEL1-TNFRSF6B	clu_30378-62312072-62316876	-0.51 (0.11)	6.83e-06	-0.27 (0.07)	7.04e-05	-0.33 (0.06)	2.98e-08	1.03e-05
20q13.33	rs2297440	rs3787088	0.61	RTEL1-TNFRSF6B	clu_30378-62312072-62316876	-0.51 (0.11)	8.65e-06	-0.27 (0.07)	7.04e-05	-0.33 (0.06)	3.61e-08	1.03e-05
20q13.33	rs2297440	rs6062298	0.6	RTEL1-TNFRSF6B	clu_30378-62312072-62316876	-0.52 (0.11)	3.08e-06	-0.25 (0.06)	0.000156	-0.32 (0.06)	5.11e-08	1.03e-05
20q13.33	rs2297440	rs6062486	0.6	RTEL1-TNFRSF6B	clu_30378-62312072-62316876	-0.51 (0.11)	3.54e-06	-0.25 (0.06)	0.000156	-0.32 (0.05)	5.49e-08	1.03e-05
20q13.33	rs2297440	rs397783825	0.98	RTEL1-TNFRSF6B	clu_30378-62312072-62316876	-0.59 (0.12)	2.56e-06	-0.26 (0.07)	0.000169	-0.33 (0.06)	7.69e-08	1.03e-05
20q13.33	rs2297440	rs3787089	0.61	RTEL1-TNFRSF6B	clu_30378-62312072-62312227	0.3 (0.09)	0.00114	0.29 (0.06)	1.45e-05	0.29 (0.05)	1.46e-07	1.03e-05
20q13.33	rs2297440	rs3787088	0.61	RTEL1-TNFRSF6B	clu_30378-62312072-62312227	0.3 (0.09)	0.00115	0.29 (0.06)	1.45e-05	0.29 (0.05)	1.47e-07	1.03e-05
20q13.33	rs2297440	rs8114049	0.61	RTEL1-TNFRSF6B	clu_30378-62312072-62312227	0.29 (0.09)	0.00176	0.29 (0.06)	1.14e-05	0.29 (0.05)	1.63e-07	1.03e-05
20q13.33	rs2297440	rs41309367	0.61	RTEL1-TNFRSF6B	clu_30378-62312072-62312227	0.29 (0.09)	0.00152	0.27 (0.06)	2.77e-05	0.28 (0.05)	4.12e-07	1.88e-05
20q13.33	rs2297440	rs6062298	0.6	RTEL1-TNFRSF6B	clu_30378-62312072-62312227	0.28 (0.09)	0.00196	0.26 (0.06)	8.79e-05	0.26 (0.05)	2e-06	5.31e-05
20q13.33	rs2297440	rs6062470	0.27	RTEL1-TNFRSF6B	clu_30378-62314011-62316876	0.42 (0.11)	0.000241	0.14 (0.07)	0.0358	0.21 (0.06)	0.00115	0.00293
20q13.33	rs2297440	rs2738774	0.32	RTEL1-TNFRSF6B	clu_30378-62314011-62316876	-0.42 (0.11)	0.000125	-0.13 (0.07)	0.0728	-0.21 (0.06)	0.00154	0.00381
20q13.33	rs2297440	rs4809320	0.82	RTEL1-TNFRSF6B	clu_30378-62314011-62316876	0.46 (0.12)	0.000294	0.14 (0.06)	0.0349	0.2 (0.06)	0.00192	0.00465
20q13.33	rs2297440	rs6010986	0.82	RTEL1-TNFRSF6B	clu_30378-62314011-62316876	0.46 (0.12)	0.000292	0.13 (0.06)	0.0358	0.2 (0.06)	0.002	0.00478
20q13.33	rs2297440	rs879471	0.17	RTEL1-TNFRSF6B	clu_30378-62314011-62316876	0.39 (0.1)	0.000216	0.12 (0.06)	0.0725	0.19 (0.05)	0.00247	0.00584
20q13.33	rs2297440	rs2236507	0.99	RTEL1-TNFRSF6B	clu_30380-62320485-62321103	-0.9 (0.09)	1.37e-20	-1.14 (0.05)	9.08e-42	-1.08 (0.04)	2.32e-142	4.16e-139
20q13.33	rs2297440	rs2777941	0.98	RTEL1-TNFRSF6B	clu_30380-62320485-62321103	-0.89 (0.09)	4.11e-20	-1.14 (0.05)	9.08e-42	-1.08 (0.04)	1.68e-141	1.51e-138
20q13.33	rs2297440	rs6062302	0.99	RTEL1-TNFRSF6B	clu_30380-62320485-62321103	-0.87 (0.09)	5.72e-20	-1.14 (0.05)	9.08e-42	-1.07 (0.04)	4.91e-141	2.94e-138
20q13.33	rs2297440	rs3208007	0.99	RTEL1-TNFRSF6B	clu_30380-62320485-62321103	-0.89 (0.09)	2.02e-20	-1.14 (0.05)	3.54e-41	-1.08 (0.04)	1.28e-139	5.74e-137
20q13.33	rs2297440	rs6011033	0.96	RTEL1-TNFRSF6B	clu_30380-62320485-62321103	-0.92 (0.09)	5.2e-21	-1.15 (0.05)	3.22e-40	-1.09 (0.05)	2.59e-120	9.31e-118
20q13.33	rs2297440	rs3208007	0.99	RTEL1-TNFRSF6B	clu_30380-62320485-62320855	0.48 (0.12)	8e-05	0.73 (0.07)	2.79e-16	0.66 (0.06)	7.9e-26	1.01e-24
20q13.33	rs2297440	rs2236507	0.99	RTEL1-TNFRSF6B	clu_30380-62320485-62320855	0.48 (0.12)	9.27e-05	0.72 (0.07)	3.67e-16	0.66 (0.06)	1.58e-25	1.98e-24
20q13.33	rs2297440	rs2777941	0.98	RTEL1-TNFRSF6B	clu_30380-62320485-62320855	0.48 (0.12)	9.32e-05	0.72 (0.07)	3.67e-16	0.66 (0.06)	1.66e-25	2.07e-24
20q13.33	rs2297440	rs6062302	0.99	RTEL1-TNFRSF6B	clu_30380-62320485-62320855	0.46 (0.12)	0.00017	0.72 (0.07)	3.67e-16	0.65 (0.06)	4.45e-25	5.51e-24
20q13.33	rs2297440	rs6062490	0.98	RTEL1-TNFRSF6B	clu_30380-62320485-62320855	0.45 (0.12)	0.000234	0.71 (0.07)	1.04e-15	0.64 (0.06)	9.37e-24	1.14e-22
20q13.33	rs2297440	rs6062302	0.99	RTEL1-TNFRSF6B	clu_30380-62321001-62321103	0.19 (0.12)	0.112	0.65 (0.07)	1.9e-15	0.54 (0.06)	5.22e-19	4.93e-18
20q13.33	rs2297440	rs2236507	0.99	RTEL1-TNFRSF6B	clu_30380-62321001-62321103	0.19 (0.12)	0.13	0.65 (0.07)	1.9e-15	0.55 (0.06)	5.42e-19	5.07e-18
20q13.33	rs2297440	rs2777941	0.98	RTEL1-TNFRSF6B	clu_30380-62321001-62321103	0.17 (0.12)	0.164	0.65 (0.07)	1.9e-15	0.54 (0.06)	9.74e-19	8.36e-18
20q13.33	rs2297440	rs3208007	0.99	RTEL1-TNFRSF6B	clu_30380-62321001-62321103	0.18 (0.12)	0.157	0.65 (0.07)	2.6e-15	0.54 (0.06)	1.48e-18	1.24e-17
20q13.33	rs2297440	rs6011033	0.96	RTEL1-TNFRSF6B	clu_30380-62321001-62321103	0.2 (0.13)	0.12	0.65 (0.07)	7.84e-15	0.55 (0.06)	1.6e-17	1.22e-16
20q13.33	rs2297440	rs3787092	0.98	RTEL1-TNFRSF6B	clu_30380-62320485-62321118	-0.35 (0.07)	5.92e-06	-0.22 (0.03)	9.57e-12	-0.24 (0.03)	4.54e-15	2.72e-14
20q13.33	rs2297440	rs3787091	0.98	RTEL1-TNFRSF6B	clu_30380-62320485-62321118	-0.35 (0.07)	5.92e-06	-0.22 (0.03)	9.57e-12	-0.24 (0.03)	4.54e-15	2.72e-14
20q13.33	rs2297440	rs2236506	0.99	RTEL1-TNFRSF6B	clu_30380-62320485-62321118	-0.34 (0.07)	7.99e-06	-0.22 (0.03)	9.82e-12	-0.24 (0.03)	5.56e-15	3.31e-14
20q13.33	rs2297440	rs397783825	0.98	RTEL1-TNFRSF6B	clu_30380-62320485-62321118	-0.34 (0.07)	9.4e-06	-0.22 (0.03)	9.57e-12	-0.24 (0.03)	6.2e-15	3.67e-14
20q13.33	rs2297440	rs3208007	0.99	RTEL1-TNFRSF6B	clu_30380-62320485-62321118	-0.34 (0.07)	9.01e-06	-0.22 (0.03)	1.07e-11	-0.24 (0.03)	7.07e-15	4.16e-14
20q13.33	rs2297440	rs2257818	0.78	RTEL1-TNFRSF6B	clu_30381-62321563-62321639	0.1 (0.07)	0.173	0.25 (0.04)	4.09e-10	0.22 (0.03)	2.28e-10	3.32e-07
20q13.33	rs2297440	rs367993153	0.78	RTEL1-TNFRSF6B	clu_30381-62321563-62321639	-0.11 (0.07)	0.147	-0.25 (0.04)	9.82e-10	-0.22 (0.03)	5.17e-10	3.32e-07
20q13.33	rs2297440	rs1295810	0.78	RTEL1-TNFRSF6B	clu_30381-62321563-62321639	0.1 (0.07)	0.156	0.25 (0.04)	9.82e-10	0.22 (0.03)	6.6e-10	3.32e-07
20q13.33	rs2297440	rs1623866	0.78	RTEL1-TNFRSF6B	clu_30381-62321563-62321639	0.1 (0.07)	0.173	0.25 (0.04)	9.82e-10	0.22 (0.03)	7.72e-10	3.32e-07
20q13.33	rs2297440	rs2236508	0.78	RTEL1-TNFRSF6B	clu_30381-62321563-62321639	0.1 (0.07)	0.173	0.25 (0.04)	9.82e-10	0.22 (0.03)	7.72e-10	3.32e-07
20q13.33	rs2297440	rs4809328	0.47	RTEL1-TNFRSF6B	clu_30385-62325841-62326419	0.25 (0.07)	0.000712	0.18 (0.06)	0.00375	0.21 (0.05)	4.88e-05	0.0275
20q13.33	rs2297440	rs150938918	0.42	RTEL1-TNFRSF6B	clu_30385-62325841-62326419	0.26 (0.07)	0.000551	0.19 (0.07)	0.00515	0.22 (0.05)	5.38e-05	0.0275
20q13.33	rs2297440	rs1056441	0.46	RTEL1-TNFRSF6B	clu_30385-62325841-62326419	0.25 (0.07)	0.000959	0.17 (0.06)	0.00725	0.2 (0.05)	0.000138	0.0275
20q13.33	rs2297440	rs4809221	0.46	RTEL1-TNFRSF6B	clu_30385-62325841-62326419	0.25 (0.07)	0.000566	0.14 (0.06)	0.0217	0.19 (0.05)	0.000338	0.0275
20q13.33	rs2297440	rs6062510	0.46	RTEL1-TNFRSF6B	clu_30385-62325841-62326419	0.25 (0.07)	0.000588	0.14 (0.06)	0.0217	0.19 (0.05)	0.000346	0.0275
20q13.33	rs2297440	rs6062487	0.03	TNFRSF6B	clu_30388-62328544-62329633	0.48 (0.15)	0.00153	0.28 (0.09)	0.00139	0.33 (0.08)	6.1e-05	0.0196
20q13.33	rs2297440	rs6122147	0.01	TNFRSF6B	clu_30388-62328544-62329633	0.54 (0.14)	0.00011	0.24 (0.09)	0.00828	0.33 (0.07)	7.33e-05	0.0196
20q13.33	rs2297440	rs41309931	0.01	TNFRSF6B	clu_30388-62328544-62329633	0.53 (0.14)	0.00014	0.24 (0.09)	0.00828	0.33 (0.08)	8.72e-05	0.0196
20q13.33	rs2297440	rs144394420	0.02	TNFRSF6B	clu_30388-62328544-62329633	0.52 (0.14)	0.000178	0.24 (0.09)	0.00828	0.32 (0.07)	9.53e-05	0.0196
20q13.33	rs2297440	rs3761121	0.01	TNFRSF6B	clu_30388-62328544-62329633	0.52 (0.14)	0.000179	0.24 (0.09)	0.00828	0.32 (0.07)	9.72e-05	0.0196
20q13.33	rs2297440	rs34538116	0.5	TNFRSF6B	clu_30388-62328544-62328681	0.02 (0.15)	0.904	0.33 (0.07)	3.4e-05	0.27 (0.07)	0.000419	0.0422
20q13.33	rs2297440	rs117940932	0.06	UCKL1	clu_30409-62577075-62577203	0.23 (0.19)	0.214	0.11 (0.05)	0.0403	0.12 (0.05)	0.0272	0.047
20q13.33	rs2297440	rs116914291	0.05	UCKL1	clu_30409-62577075-62577203	0.2 (0.18)	0.278	0.11 (0.06)	0.0587	0.11 (0.05)	0.0411	0.047
20q13.33	rs2297440	rs77947172	0.05	UCKL1	clu_30409-62577075-62577203	0.2 (0.17)	0.245	0.1 (0.05)	0.0718	0.11 (0.05)	0.047	0.047
22q13.1	rs2235573	rs6000906	0.22	TRIOBP	clu_28289-38161824-38164050	-0.21 (0.09)	0.0179	-0.16 (0.05)	0.00398	-0.17 (0.05)	0.000692	0.00452
22q13.1	rs2235573	rs13911	0.21	TRIOBP	clu_28289-38161824-38164050	-0.21 (0.09)	0.0168	-0.16 (0.05)	0.00417	-0.17 (0.05)	0.000697	0.00452
22q13.1	rs2235573	rs2284058	0.22	TRIOBP	clu_28289-38161824-38164050	-0.21 (0.09)	0.0179	-0.16 (0.05)	0.00417	-0.17 (0.05)	0.000733	0.00452
22q13.1	rs2235573	rs5995502	0.22	TRIOBP	clu_28289-38161824-38164050	-0.2 (0.09)	0.0199	-0.16 (0.05)	0.00398	-0.17 (0.05)	0.000749	0.00452
22q13.1	rs2235573	rs2269617	0.22	TRIOBP	clu_28289-38161824-38164050	-0.2 (0.09)	0.0206	-0.16 (0.05)	0.00417	-0.17 (0.05)	0.000814	0.00452
22q13.1	rs2235573	rs4821717	0.22	GCAT	clu_28294-38204170-38205956	-1.09 (0.09)	8.88e-25	-0.91 (0.09)	5.1e-18	-1 (0.06)	4.01e-52	1.41e-49
22q13.1	rs2235573	rs13911	0.21	GCAT	clu_28294-38204170-38205956	-1.09 (0.09)	7.85e-25	-0.84 (0.09)	7.79e-17	-0.96 (0.06)	1.54e-49	2.7e-47
22q13.1	rs2235573	rs2269617	0.22	GCAT	clu_28294-38204170-38205956	-1.09 (0.09)	1.12e-24	-0.84 (0.09)	7.79e-17	-0.96 (0.06)	2.73e-49	3.21e-47
22q13.1	rs2235573	rs2017022	0.22	GCAT	clu_28294-38204170-38205956	-1.09 (0.09)	8.88e-25	-0.89 (0.09)	3.51e-16	-0.99 (0.07)	5.9e-49	5.19e-47
22q13.1	rs2235573	rs5750501	0.21	GCAT	clu_28294-38204170-38205956	-1.09 (0.09)	3.35e-24	-0.84 (0.09)	7.79e-17	-0.96 (0.06)	1.42e-48	1e-46
22q13.1	rs2235573	rs4821717	0.22	GCAT	clu_28294-38204170-38206034	0.6 (0.11)	6.51e-08	0.74 (0.09)	6.84e-14	0.68 (0.07)	1.42e-22	9.08e-22
22q13.1	rs2235573	rs2269617	0.22	GCAT	clu_28294-38204170-38206034	0.59 (0.11)	7.73e-08	0.65 (0.08)	2.18e-12	0.63 (0.07)	2.76e-20	1.73e-19
22q13.1	rs2235573	rs739269	0.21	GCAT	clu_28294-38204170-38206034	0.59 (0.11)	1.38e-07	0.65 (0.08)	2.18e-12	0.63 (0.07)	5.31e-20	3.16e-19
22q13.1	rs2235573	rs13911	0.21	GCAT	clu_28294-38204170-38206034	0.58 (0.11)	1.37e-07	0.65 (0.08)	2.18e-12	0.62 (0.07)	5.41e-20	3.16e-19
22q13.1	rs2235573	rs5750501	0.21	GCAT	clu_28294-38204170-38206034	0.58 (0.11)	1.38e-07	0.65 (0.08)	2.18e-12	0.62 (0.07)	5.43e-20	3.16e-19
22q13.1	rs2235573	rs532463976	0.21	TMEM184B	clu_28305-38612721-38620792	-0.04 (0.08)	0.614	-0.15 (0.04)	0.00084	-0.12 (0.04)	0.00194	0.00449
22q13.1	rs2235573	rs11570750	0.21	TMEM184B	clu_28305-38612721-38620792	-0.04 (0.08)	0.603	-0.15 (0.04)	0.00096	-0.12 (0.04)	0.0021	0.00449
22q13.1	rs2235573	rs11570747	0.21	TMEM184B	clu_28305-38612721-38620792	-0.04 (0.08)	0.603	-0.14 (0.04)	0.000854	-0.12 (0.04)	0.00238	0.00449
22q13.1	rs2235573	rs12169611	0.21	TMEM184B	clu_28305-38612721-38620792	-0.04 (0.08)	0.603	-0.14 (0.04)	0.000854	-0.12 (0.04)	0.00238	0.00449
22q13.1	rs2235573	rs11570745	0.21	TMEM184B	clu_28305-38612721-38620792	-0.04 (0.08)	0.615	-0.14 (0.04)	0.000854	-0.12 (0.04)	0.00243	0.00449
22q13.1	rs2235573	rs6000943	0.39	C22orf23	clu_28314-38341132-38343288	0.14 (0.12)	0.248	0.25 (0.04)	9.42e-09	0.24 (0.04)	1.1e-07	4.5e-05
22q13.1	rs2235573	rs139883	0.39	C22orf23	clu_28314-38341132-38343288	-0.15 (0.12)	0.223	-0.25 (0.04)	2.72e-08	-0.24 (0.04)	2.81e-07	4.5e-05
22q13.1	rs2235573	rs139886	0.39	C22orf23	clu_28314-38341132-38343288	-0.15 (0.12)	0.223	-0.25 (0.04)	2.72e-08	-0.24 (0.04)	2.81e-07	4.5e-05
22q13.1	rs2235573	rs139887	0.39	C22orf23	clu_28314-38341132-38343288	-0.15 (0.12)	0.223	-0.25 (0.04)	2.72e-08	-0.24 (0.04)	2.81e-07	4.5e-05
22q13.1	rs2235573	rs5756853	0.4	C22orf23	clu_28314-38341132-38343288	0.14 (0.12)	0.248	0.24 (0.04)	4.34e-08	0.23 (0.04)	4.94e-07	4.5e-05
22q13.1	rs2235573	rs6001001	0.88	BAIAP2L2	clu_28321-38482456-38483131	-0.23 (0.1)	0.0302	-0.27 (0.05)	4.87e-07	-0.26 (0.05)	6.79e-07	0.000163
22q13.1	rs2235573	rs4296527	0.88	BAIAP2L2	clu_28321-38482456-38483131	-0.2 (0.1)	0.0535	-0.28 (0.05)	2.72e-07	-0.26 (0.05)	7.06e-07	0.000163
22q13.1	rs2235573	rs4821737	0.88	BAIAP2L2	clu_28321-38482456-38483131	-0.22 (0.1)	0.0407	-0.27 (0.05)	3.83e-07	-0.26 (0.05)	7.28e-07	0.000163
22q13.1	rs2235573	rs6001002	0.89	BAIAP2L2	clu_28321-38482456-38483131	-0.21 (0.1)	0.0446	-0.27 (0.05)	4.87e-07	-0.26 (0.05)	1.01e-06	0.000163
22q13.1	rs2235573	rs5995536	0.89	BAIAP2L2	clu_28321-38482456-38483131	-0.21 (0.11)	0.0426	-0.27 (0.05)	6.12e-07	-0.26 (0.05)	1.19e-06	0.000163
22q13.1	rs2235573	rs9610902	0.59	BAIAP2L2	clu_28321-38482637-38483131	0.2 (0.06)	0.00179	0.09 (0.04)	0.00907	0.12 (0.03)	0.0016	0.0264
22q13.1	rs2235573	rs62235125	0.59	BAIAP2L2	clu_28321-38482637-38483131	0.2 (0.06)	0.00169	0.09 (0.04)	0.0135	0.12 (0.03)	0.00244	0.0393
22q13.1	rs2235573	rs132931	0.63	BAIAP2L2	clu_28321-38482637-38483131	0.21 (0.06)	0.0014	0.09 (0.04)	0.0153	0.11 (0.03)	0.00272	0.0425
22q13.1	rs2235573	rs9610902	0.59	BAIAP2L2	clu_28321-38481382-38483131	0.24 (0.07)	0.000943	0.1 (0.04)	0.0157	0.13 (0.03)	0.00247	0.0393
22q13.1	rs2235573	rs4610161	0.21	PLA2G6	clu_28333-38521698-38522378	0.04 (0.09)	0.695	0.32 (0.05)	2.36e-10	0.25 (0.04)	1.28e-07	8.06e-05
22q13.1	rs2235573	rs4821740	0.21	PLA2G6	clu_28333-38521698-38522378	0.04 (0.09)	0.671	0.3 (0.05)	2.45e-09	0.24 (0.04)	7.25e-07	8.06e-05
22q13.1	rs2235573	rs11089863	0.21	PLA2G6	clu_28333-38521698-38522378	0.04 (0.09)	0.679	0.3 (0.05)	2.45e-09	0.24 (0.04)	7.42e-07	8.06e-05
22q13.1	rs2235573	rs11570745	0.21	PLA2G6	clu_28333-38521698-38522378	0.04 (0.09)	0.682	0.3 (0.05)	2.45e-09	0.24 (0.04)	7.46e-07	8.06e-05
22q13.1	rs2235573	rs11570747	0.21	PLA2G6	clu_28333-38521698-38522378	0.04 (0.09)	0.695	0.3 (0.05)	2.45e-09	0.24 (0.04)	7.89e-07	8.06e-05
22q13.1	rs2235573	rs5756916	0.21	PLA2G6	clu_28334-38522456-38525461	-0.06 (0.1)	0.588	-0.22 (0.04)	8.43e-08	-0.2 (0.04)	2.78e-07	7.84e-05
22q13.1	rs2235573	rs532463976	0.21	PLA2G6	clu_28334-38522456-38525461	-0.11 (0.1)	0.296	-0.21 (0.04)	3.26e-07	-0.2 (0.04)	4.34e-07	7.84e-05
22q13.1	rs2235573	rs9622726	0.21	PLA2G6	clu_28334-38522456-38525461	-0.03 (0.1)	0.738	-0.22 (0.04)	1.32e-07	-0.19 (0.04)	5.84e-07	7.84e-05
22q13.1	rs2235573	rs11570750	0.21	PLA2G6	clu_28334-38522456-38525461	-0.1 (0.1)	0.318	-0.21 (0.04)	3.77e-07	-0.2 (0.04)	5.92e-07	7.84e-05
22q13.1	rs2235573	rs140101268	0.21	PLA2G6	clu_28334-38522456-38525461	-0.08 (0.1)	0.431	-0.21 (0.04)	4.21e-07	-0.19 (0.04)	9.38e-07	8.78e-05
22q13.1	rs2235573	rs5756916	0.21	PLA2G6	clu_28334-38523465-38524276	0.17 (0.11)	0.117	0.23 (0.06)	5.42e-05	0.22 (0.05)	9.34e-05	0.00275
22q13.1	rs2235573	rs4610161	0.21	PLA2G6	clu_28334-38523465-38524276	0.12 (0.1)	0.266	0.22 (0.05)	0.000135	0.19 (0.05)	0.00059	0.013
22q13.1	rs2235573	rs5750541	0.25	PLA2G6	clu_28334-38523465-38524276	0.16 (0.11)	0.142	0.2 (0.05)	0.000288	0.19 (0.05)	0.00062	0.013
22q13.1	rs2235573	rs140101268	0.21	PLA2G6	clu_28334-38523465-38524276	0.13 (0.11)	0.223	0.21 (0.06)	0.000297	0.19 (0.05)	0.00101	0.015
22q13.1	rs2235573	rs12167576	0.21	PLA2G6	clu_28334-38523465-38524276	0.12 (0.1)	0.263	0.2 (0.05)	0.000252	0.19 (0.05)	0.00105	0.015
22q13.1	rs2235573	rs4610161	0.21	PLA2G6	clu_28334-38522456-38522769	0.12 (0.1)	0.243	0.23 (0.06)	9.23e-05	0.2 (0.05)	0.000428	0.0119
22q13.1	rs2235573	rs6001009	0.21	PLA2G6	clu_28334-38522456-38522769	0.16 (0.1)	0.137	0.22 (0.06)	0.000205	0.2 (0.05)	0.000473	0.0124
22q13.1	rs2235573	rs5750541	0.25	PLA2G6	clu_28334-38522456-38522769	0.1 (0.1)	0.358	0.22 (0.05)	7.23e-05	0.2 (0.05)	0.000491	0.0124
22q13.1	rs2235573	rs11570745	0.21	PLA2G6	clu_28334-38522456-38522769	0.12 (0.1)	0.236	0.22 (0.06)	0.000156	0.19 (0.05)	0.000666	0.013
22q13.1	rs2235573	rs12167576	0.21	PLA2G6	clu_28334-38522456-38522769	0.12 (0.1)	0.241	0.22 (0.06)	0.000156	0.19 (0.05)	0.000684	0.013
